# The developmental biology of Dishevelled: an enigmatic protein governing cell fate and cell polarity

John B. Wallingford<sup>1</sup> and Raymond Habas<sup>2,3</sup>

<sup>1</sup>Section of Molecular Cell and Developmental Biology, and Institute for Cellular and Molecular Biology, University of Texas, Austin, TX 78712, USA

<sup>2</sup>Department of Biochemistry, UMDNJ-Robert Wood Johnson Medical School, Piscataway, NJ 08854, USA

<sup>3</sup>Cancer Institute of New Jersey, UMDNJ-Robert Wood Johnson Medical School, Piscataway, NJ 08854, USA

e-mail: wallingford@mail.utexas.edu and habasra@umdnj.edu

Development 132, 4421-4436

Published by The Company of Biologists 2005

doi:10.1242/dev.02068

## Summary

The Dishevelled protein regulates many developmental processes in animals ranging from *Hydra* to humans. Here, we discuss the various known signaling activities of this enigmatic protein and focus on the biological processes that Dishevelled controls. Through its many signaling activities, Dishevelled plays important roles in the embryo and the

adult, ranging from cell-fate specification and cell polarity to social behavior. Dishevelled also has important roles in the governance of polarized cell divisions, in the directed migration of individual cells, and in cardiac development and neuronal structure and function.

## Introduction

In its original definition, the word 'dishevelled' applied specifically to one's hair, its definition being 'without a hat' or, more commonly, 'un-coiffed'. Fittingly, the *dishevelled* gene was first identified and so named because in flies bearing this mutation the body and wing hairs fail to orient properly (Fahmy and Fahmy, 1959). (It may be of interest to some scientists, as it was to one of the authors, that dishevelled likely derives from the Spanish and French words for 'bald'.)

The *dishevelled* gene encodes a much-studied signal transduction protein that governs numerous biological processes. Nonetheless, our understanding of this protein has remained, well, dishevelled despite the identification of the first allele 50 years ago. It is clear that *dishevelled* encodes a protein that is an essential component of both the canonical WNT and the planar cell polarity (PCP) signaling cascades, and also signals via the WNT/Ca<sup>2+</sup> pathway (Box 1, Fig. 1). The protein governs biological processes as distinct as cell polarity and cell fate specification, and even social behavior.

Much has been written about WNT signaling pathways, so this review will only briefly summarize our understanding of Dishevelled signaling activities and will instead concentrate on the biological processes that Dishevelled controls.

## Dishevelled: an overview

The first alleles of the *dishevelled* (*dsh*) gene were identified in *Drosophila* mutants (Fahmy and Fahmy, 1959), and were characterized by disruptions in hair and bristle polarity. The locus attracted little attention until the 1980s, when it was discovered that this gene played a key role in segment polarity in the early embryo (Perrimon and Mahowald, 1987). Genetic experiments in early *Drosophila* embryos first placed Dsh in the canonical Wingless/WNT signaling pathway governing segment polarity (Couso et al., 1994; Noordermeer et al., 1994; Riggelman et al., 1990; Siegfried et al., 1994). Subsequent

experiments demonstrated that *dishevelled* was also involved in the Frizzled-dependent signaling cascade governing PCP in the wing, legs and abdomen (Krasnow et al., 1995; Theisen et al., 1994). The cloning of the *Drosophila dsh* gene unveiled a novel protein (Klingensmith et al., 1994; Theisen et al., 1994), and additional experiments in the fly demonstrated that Dishevelled is positioned at the branchpoint between the canonical WNT and PCP signaling pathways (Axelrod et al., 1998; Boutros et al., 1998).

The first vertebrate homolog of *dishevelled*, murine *Dvl1*, was identified shortly thereafter, as was the *Xenopus* homolog *Xdsh*, two additional mouse genes (*Dvl2* and *Dvl3*) and three human DVL genes (Klingensmith et al., 1996; Pizzuti et al., 1996; Semenov and Snyder, 1997; Sokol et al., 1995; Sussman et al., 1994; Tsang et al., 1996). The vertebrate proteins are highly homologous to *Drosophila* Dishevelled, and experiments in *Xenopus* demonstrated that XDSH is an important part of the canonical WNT signaling cascade that controls early patterning in vertebrates (Dominguez et al., 1995; Sokol et al., 1995). In fact, interspecific experiments have demonstrated that Dishevelled function is highly conserved between flies, mice and frogs (Klingensmith et al., 1996; Rothbacher et al., 1995). More recently, vertebrate Dishevelled, like the fly counterpart, has been shown to also signal via a PCP cascade, controlling cell polarity during convergent extension cell movements that drive gastrulation (Heisenberg et al., 2000; Li et al., 1999b; Tada and Smith, 2000; Wallingford et al., 2000).

## The structure of Dishevelled proteins

Dishevelled proteins are 500 to 600 amino acids in length and are modular. Each contains three highly conserved domains (Box 1, Fig. 2), and whereas the overall structure of Dishevelled has not been defined, structural descriptions of each of the three major domains have been reported (Box 1).

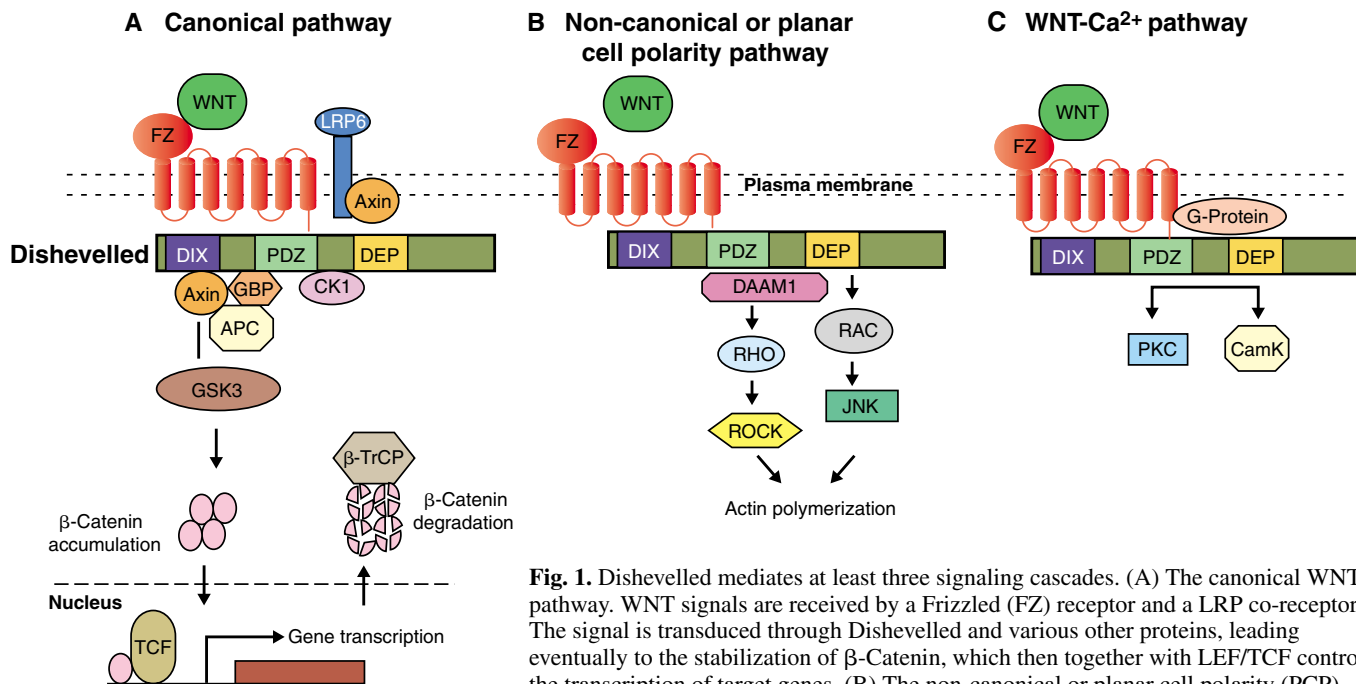

**Fig. 1.** Dishevelled mediates at least three signaling cascades. (A) The canonical WNT pathway. WNT signals are received by a Frizzled (FZ) receptor and a LRP co-receptor. The signal is transduced through Dishevelled and various other proteins, leading eventually to the stabilization of  $\beta$ -Catenin, which then together with LEF/TCF controls the transcription of target genes. (B) The non-canonical or planar cell polarity (PCP) cascade. A signal is received by a FZ receptor (in *Drosophila*, no WNT has yet been

implicated in PCP signaling in vertebrates, although WNT11 and WNT5a are necessary), and transduced via Dishevelled to RAC and RHO, which then activate downstream targets to modulate the actin cytoskeleton. (C) The WNT/Ca<sup>2+</sup> pathway. WNT signaling through the FZ receptors and Dishevelled and G-proteins leads to the release of intracellular calcium and signaling via Phospholipase C, CamK2 and PKC (Miller et al., 1999a; Sheldahl et al., 1999; Sheldahl et al., 2003). Image reproduced with permission from BioMedCentral (see Habas and Dawid, 2005). APC, Adenomatous Polyposis Coli; CKI, Casein kinase 1; CamK2, calcium/calmodulin-dependent kinase 2; GBP, GSK3 Binding Protein; GSK3, Glycogen synthase kinase 3; JNK, Jun kinase; LRP, Low-density lipoprotein receptor-related protein; PKC, Protein kinase C; TCF/LEF, Lymphoid Enhancer-Binding Factor/T-Cell Specific Transcription Factor;  $\beta$ -TrCP, Beta-Transducin Repeat Containing Protein; ROCK, RHO-associated coiled-coil forming kinase.

In addition to these commonly discussed domains of Dishevelled, several additional conserved regions deserve attention (Box 1, Fig. 2). For example, there is a basic region and scattered serine/threonine-rich stretches between the DIX and PDZ domains, and there is a proline-rich region with a SH3 protein-binding motif downstream of the PDZ (Penton et al., 2002; Rothbächer et al., 2000). A comparison of Dishevelled protein sequences from hydra to human reveals the presence of several invariant residues downstream of the DEP domain, and the extreme C terminus is very highly conserved across species (Fig. 3). The significance of these conserved C-terminal residues for Dishevelled function remains unexplored.

### Mechanisms of Dishevelled signaling

A fascinating aspect of Dishevelled is that this protein forms a branchpoint that links several widely deployed signaling pathways (Fig. 1). In this section, we discuss the proteins in the canonical WNT and PCP signaling pathways that function upstream and downstream of Dishevelled. As these signaling cascades have been extensively reviewed elsewhere, we will only attempt a thumbnail sketch of each pathway.

#### Upstream of Dishevelled: WNTs, receptors and co-receptors

With the sequencing of the human genome, nineteen WNT ligands have been identified (for reviews, see He et al., 2004; Logan and Nusse, 2004). The receptors for the WNT ligand were identified as members of the seven-pass Frizzled (FZ)

gene family (see Huang and Klein, 2004). Members of the low-density lipoprotein-related receptor proteins (LRP), including *Drosophila* Arrow and vertebrate LRP5 and LRP6, function as co-receptors for WNTs (Pinson et al., 2000; Tamai et al., 2000; Wehrli et al., 2000).

As the LRP co-receptors only impinge on canonical signaling, it is possible that co-receptors may exist that channel WNT signals into the non-canonical arm and several proteins, including NRH1 [p75(NTR)-related transmembrane protein] (Chung et al., 2005; Sasai et al., 2004), protein tyrosine kinase 7 (PTK7) (Lu et al., 2004b), receptor tyrosine kinase-like orphan receptor 2 (ROR2) (Hikasa et al., 2002) and glypican (Topczewski et al., 2001), can modulate non-canonical WNT signaling. However, only ROR2 has been shown to bind to WNT (Hikasa et al., 2002), and as yet no evidence exists that these factors exist in a WNT/Frizzled complex to imply bona-fide co-receptor status for non-canonical signaling.

#### 'Activation' of Dishevelled

Downstream of the WNT/FZ/LRP complex, signaling is transduced to Dishevelled, but it is hard to define the nature of 'activated' Dishevelled. Undoubtedly, Dishevelled becomes phosphorylated in response to WNT signaling, but the role of this phosphorylation remains unclear (Lee et al., 1999; Rothbächer et al., 2000; Willert et al., 1997; Yanagawa et al., 1995). Several kinases have been reported to phosphorylate Dishevelled, including Casein kinase 1 $\epsilon$ , Casein kinase 2 and PAR1 (Cong et al., 2004a; Ossipova et al., 2005; Sun et al.,

2001; Willert et al., 1997). The mechanisms by which the signal is transduced to 'activate' Dishevelled remains mysterious and incompletely understood, although a recent report has demonstrated that FZ can directly bind to the PDZ domain of Dishevelled, albeit with weak affinity (Wong et al., 2003). The DEP domain of Dishevelled also appears to be involved in signal reception, as a deletion construct of mouse DVL1 containing only the DEP domain can inhibit the effects of overexpressed WNT, but not those of overexpressed wild-type DVL (Wong et al., 2000). Moreover, WNT signaling stimulates the DEP-mediated translocation of Dishevelled to the cell membrane (Axelrod et al., 1998; Boutros et al., 2000). In terms of downstream readouts, the mode of Dishevelled action is quite different depending upon which pathway is being discussed.

### Canonical WNT signaling

At least two models have been advanced to explain the effects of Dishevelled on canonical WNT signaling (Fig. 1A) (for reviews, see Logan and Nusse, 2004; Seto and Bellen, 2004; Tolwinski and Wieschaus, 2004). In the first model, Dishevelled functions epistatically downstream of the Frizzled/LRP complex. To bolster this model, studies have revealed that the overexpression of Dishevelled can activate  $\beta$ -catenin signaling in *Drosophila* Arrow mutants (Wehrli et al., 2000), and that a constitutively active dFZ2-Arrow fusion cannot transduce signaling in a Dishevelled mutant background (Tolwinski et al., 2003). In this model, a likely mechanism by which Dishevelled functions is via the inhibition of Axin function (see below).

Dishevelled can bind Axin and inhibit its activity (Fagotto et al., 1999; Kishida et al., 1999; Li et al., 1999a; Smalley et al., 1999). Axin interacts with LRP5 (Mao et al., 2001) in a

WNT-stimulated manner and is a potent negative regulator of WNT signaling (Zeng et al., 1997). It is possible that the interaction of Dishevelled with Axin is sufficient to inhibit the function of Axin, either through its sequestration or by the induction of its degradation. It is also noteworthy that both Axin and Dishevelled have been shown to cycle in and out of the nucleus, although the role of this nuclear shuttling remains unclear (Cliffe et al., 2003; Cong and Varmus, 2004; Habas and Dawid, 2005; Itoh et al., 2005). Furthermore, Frizzled overexpression can recruit Dishevelled to the membrane (Boutros et al., 2000; Rothbächer et al., 2000; Steitz et al., 1996), where Axin and Dishevelled have been found to be co-localized (Fagotto et al., 1999; Smalley et al., 1999). It is thus tempting to speculate that such interactions facilitate the binding of Dishevelled to Axin, thus activating canonical signaling.

In the second model, Dishevelled signals through a parallel pathway, whereby a FZ/Dishevelled complex functions independently from the FZ/LRP/Axin/Dishevelled complex. Support for this model comes from experiments in which the reduction of all Dishevelled isoforms from mammalian cultured cells did not impede signaling stimulated by an activated form of LRP (Li et al., 2002; Schweizer and Varmus, 2003). Another study has found that WNT-induced phosphorylation of Dishevelled can be achieved independently of LRPs (Gonzalez-Sancho et al., 2004).

In the absence of WNT stimulation,  $\beta$ -catenin is targeted for degradation through the proteosomal pathway (Aberle et al., 1997; Liu et al., 2002). Whatever emerges as the mechanism by which Dishevelled functions, it appears safe to say that, upon WNT stimulation, Dishevelled acts to block the phosphorylation of  $\beta$ -catenin (Amit et al., 2002; Dominguez et al., 1995; van Noort et al., 2002). This in turn results in the cytoplasmic accumulation of  $\beta$ -catenin, which then traffics into the nucleus, where it complexes with members of the LEF/TCF family of transcription factors and induces the transcription of WNT-target genes (Bienz and Clevers, 2003; Liu et al., 2002; Yanagawa et al., 2002; Yost et al., 1996).

### Planar cell polarity signaling

The 'non-canonical' WNT, or PCP, pathway signals downstream to the actin cytoskeleton and appears to be independent of transcription (Fig. 1B). A WNT signal, or another extracellular PCP signal, is received by a Frizzled receptor. Frizzled, and several other PCP effectors, including Strabismus, Diego and Prickle, then work together to govern the asymmetric accumulation of a complex of proteins at the plasma membrane that includes Dishevelled (for reviews, see Klein and Mlodzik, 2005; Veeman et al., 2003; Wallingford et al., 2002). Indeed, one recent study showed that Diego and Prickle competitively bind to Dishevelled to regulate its function in the PCP pathway (Jenny et al., 2005).

At the level of Dishevelled, two independent and parallel pathways lead downstream to the activation of the small GTPases RHO and RAC (Eaton et al., 1996; Fanto et al., 2000; Habas et al., 2003; Strutt et al., 1997; Tahinci and Symes, 2003). The first pathway signals to RHO, and occurs through the molecule DAAM1 (Dishevelled associated activator of morphogenesis 1) (Habas et al., 2001). This RHO pathway leads to the activation of the RHO-associated kinase ROCK,

#### Box 1. The conserved elements of Dishevelled protein

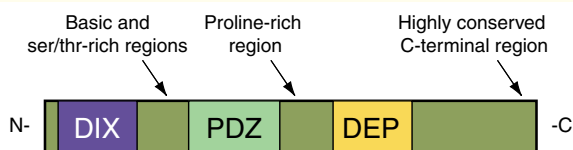

At the N terminus of Dishevelled is a DIX (Dishevelled/Axin) domain that is largely  $\alpha$ -helical in structure (Capelluto et al., 2002). At its center lies a PDZ (PSD-95, DLG, ZO1) domain, which consists of six  $\beta$ -sheets that enfold two  $\alpha$ -helices, which form a hydrophobic cleft that facilitates binding to other proteins (Cheyette et al., 2002; Wong et al., 2003). Slightly downstream from the PDZ domain lies a DEP (Dishevelled, EGL-10, Pleckstrin) domain, consisting of a bundle of three  $\alpha$ -helices (Wong et al., 2000).

For 'canonical' WNT signaling, the DIX and PDZ domains of DSH are clearly used, and some contribution may also be made by the DEP domain (Axelrod et al., 1998; Boutros et al., 1998; Moriguchi et al., 1999; Penton et al., 2002; Rothbächer et al., 2000). For PCP signaling, the PDZ and DEP domains are used (Axelrod et al., 1998; Boutros et al., 1998; Heisenberg et al., 2000; Moriguchi et al., 1999; Tada and Smith, 2000; Wallingford et al., 2000). For WNT/ $\text{Ca}^{2+}$  signaling, the PDZ and DEP domains, but not the DIX domain, are essential (Sheldahl et al., 2003).

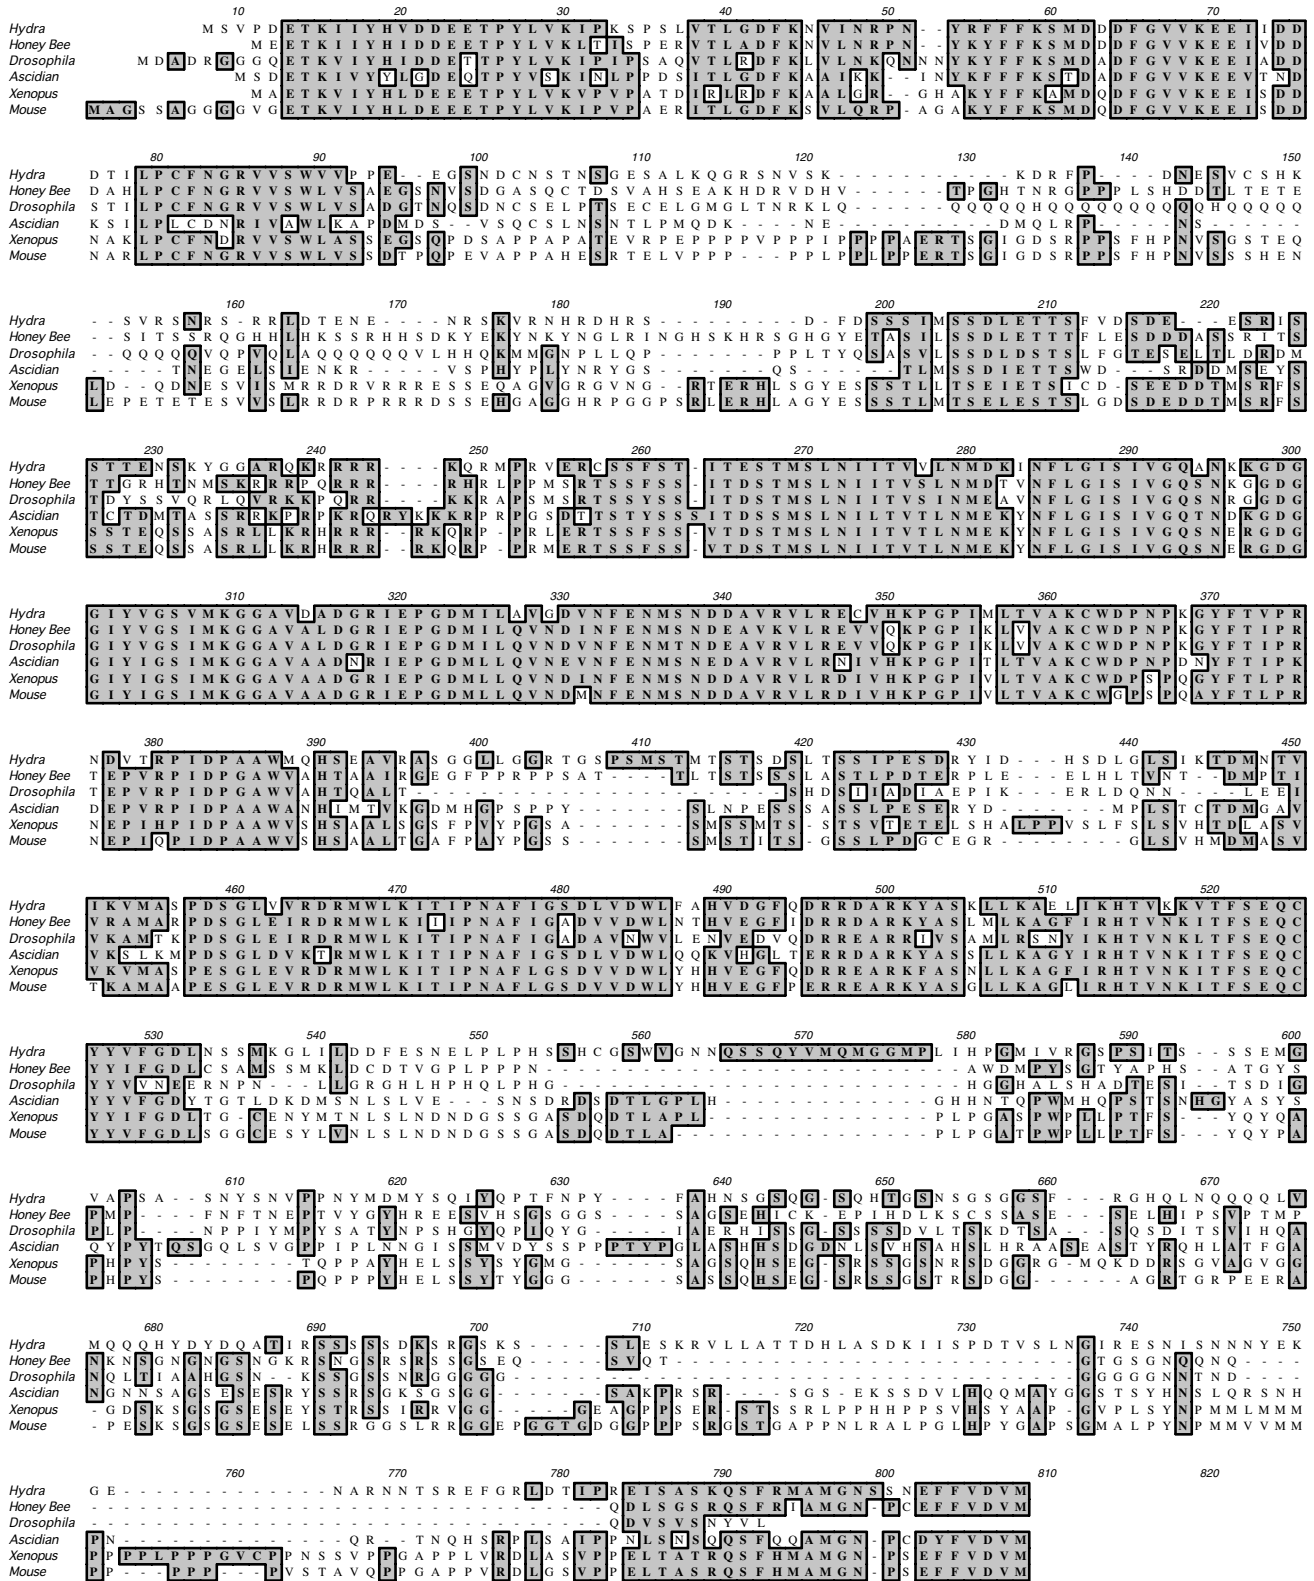

**Fig. 2.** Alignment of Dishevelled protein sequences from *Hydra*, honey bee, *Drosophila*, *Ciona*, *Xenopus* and mouse. The DIX domain covers approximately amino acid (aa) 15-90, the PDZ domain covers approximately aa 260-360, and the DEP domain covers approximately aa 460-530. Downstream of the DEP domain, an invariant proline, serine and two glycines can be found. The extreme C-terminal 24 amino acids are also very highly conserved from *Hydra* (and also in the planarian, not shown) to mouse. Curiously, although well conserved in the honey bee, this region is poorly conserved in published *Drosophila* DSH sequences, and a cursory BLAST search failed to find a similar sequence in the *Drosophila* genome.

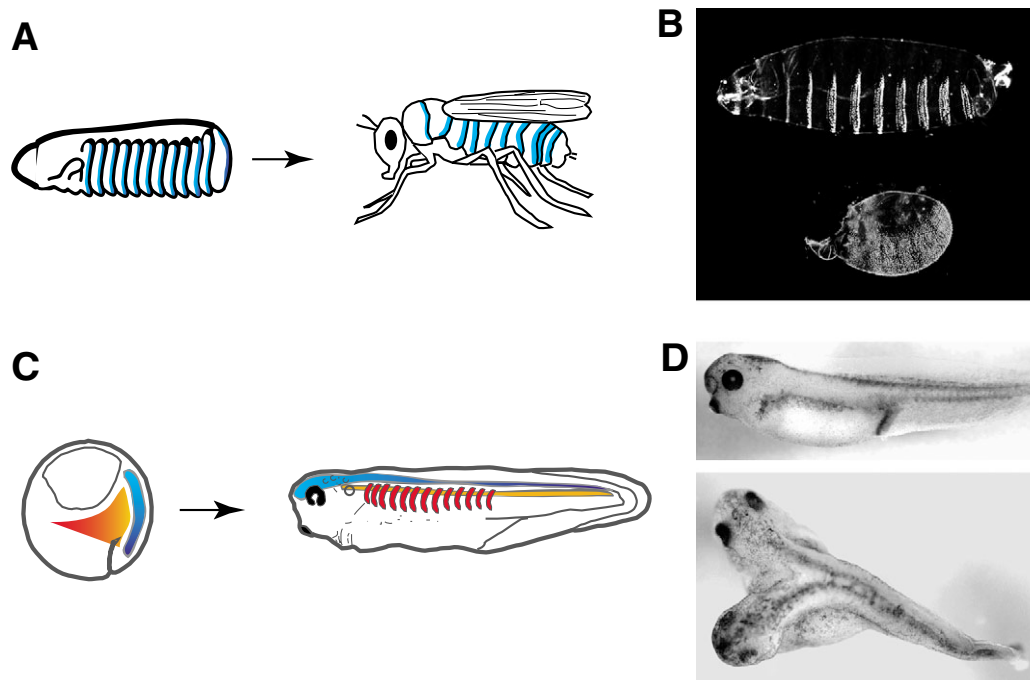

**Fig. 3.** Dishevelled-dependent canonical WNT signals govern embryo patterning. (A) Dishevelled is required to maintain segment polarity in *Drosophila*. A WNT signal (blue) is produced in the posterior of each segment and is received by Frizzled receptors on the anterior-most cell of the neighboring segment. This canonical WNT signal is transduced by Dishevelled. (B) A wild-type *Drosophila* embryo (top) and an embryo with disrupted canonical Wingless/WNT signaling (bottom). Images courtesy of K. Wharton (University of Texas, Southwestern Medical School). (C) Canonical WNT signals govern both dorsoventral patterning of the mesoderm (orange denotes dorsal; red, ventral) and anteroposterior patterning of the neuroectoderm (light blue denotes anterior; dark blue, posterior). (D) A normal *Xenopus* embryo (top) and an embryo with a duplicated axis resulting from ectopic ventral activation of canonical WNT signaling (bottom).

which mediates cytoskeletal re-organization (Kim and Han, 2005; Marlow et al., 2002; Veeman et al., 2003; Winter et al., 2001). A second pathway activates RAC, which in turn stimulates JNK activity (Boutros et al., 1998; Habas et al., 2003; Li et al., 1999b; Yamanaka et al., 2002).

It should be noted here that the true nature of Dishevelled function in the PCP cascade, as in the canonical pathway, remains mysterious. Several lines of evidence indicate that PCP signaling terminates with control of the actin cytoskeleton, and Dishevelled can activate the well-known actin regulators RHO and RAC (Habas et al., 2003; Tahinci and Symes, 2003). But it is also important to recognize that Dishevelled may speak to the actin cytoskeleton in a much more direct way. Dishevelled binds to DAAM1, a formin-homology protein (Habas et al., 2001), and formins are now recognized as being direct nucleators of linear actin cables (Sagot et al., 2002; Watanabe and Higashida, 2004). It seems likely that Dishevelled may employ multiple lines of communication to the actin cytoskeleton.

#### WNT/Ca<sup>2+</sup> and beyond

Finally, other non-canonical pathways are now emerging. Foremost among them is the WNT/Ca<sup>2+</sup> pathway, which may actually influence the function of both the canonical and PCP pathways (Fig. 1C) (Miller et al., 1999a; Sheldahl et al., 2003). In addition to the canonical and non-canonical WNT pathways, studies indicate that Dishevelled may also have 'supra-canonical' activities. For example, Dishevelled governs microtubule stability in neurons via Glycogen synthase kinase

3 (GSK3) and Axin, but not via other WNT pathway components (Krylova et al., 2000). Dishevelled also regulates cell migration in the *Drosophila* ovary in collaboration with WNT and Frizzled, but not with other components of the canonical or non-canonical pathways (Cohen et al., 2002).

#### Pathway specificity

Tremendous effort has gone into comprehending how Dishevelled channels a WNT signal into a distinct pathway. Two streams of thought have emerged, which are by no means mutually exclusive. The first involves the choice of effector molecules and the second, subcellular localization.

#### Binding partners

In over two decades of research, at least 29 Dishevelled-binding proteins have been identified (Table 1) (see also Wharton, 2003). How does one make sense of such a vast number of partners and how could they generate specificity? The WNT signal utilizes distinct domains of Dishevelled to branch signaling into the separate downstream pathways (Axelrod et al., 1998; Boutros et al., 1998). So, one convenient approach to synthesizing this information is to discuss the partners on the basis of the domains to which they bind.

The DIX domain of Dishevelled functions exclusively in canonical signaling and interacts with itself (homodimerization) and with Axin (Itoh et al., 2000; Julius et al., 2000; Kishida et al., 1999; Rothbacher et al., 2000; Smalley et al., 1999). When overexpressed, the DIX domain has been shown to act as a potent dominant-negative construct that

**Table 1. Dishevelled-associated proteins\***

| Component                     | Dishevelled domain bound | Binding assay <sup>†</sup>                          | Role                   | Cellular localization              | Pathway function                                                                                 | Reference                                                                                   |
|-------------------------------|--------------------------|-----------------------------------------------------|------------------------|------------------------------------|--------------------------------------------------------------------------------------------------|---------------------------------------------------------------------------------------------|
| Dishevelled                   | DIX                      | Yeast two hybrid<br>IP<br>GST-pulldown              | Agonist                | Cytoplasmic<br>Membrane<br>Nuclear | GOF: canonical/PCP/Ca <sup>2+</sup><br>LOF: canonical/PCP<br>DN: canonical/PCP/ Ca <sup>2+</sup> | Kishida et al., 1999;<br>Rothbächer et al., 2000                                            |
| PAK1                          | DIX                      | IP<br>GST-pulldown                                  | Agonist                | Cytoplasmic<br>Membrane            | AchR clustering                                                                                  | Luo et al., 2002                                                                            |
| Axin                          | DIX<br>PDZ               | Yeast two hybrid<br>IP<br>GST-pulldown              | Antagonist             | Cytoplasmic<br>Membrane<br>Nuclear | GOF: canonical<br>LOF: canonical<br>DN: canonical                                                | Itoh et al., 2000; Julius et al.,<br>2000; Kishida et al., 1999;<br>Zeng et al., 1997       |
| Frizzled                      | PDZ                      | Yeast two hybrid<br>IP<br>GST-pulldown              | Agonist                | Membrane                           | GOF: canonical/PCP/Ca <sup>2+</sup><br>LOF: canonical/PCP<br>DN: canonical/PCP                   | Cong et al., 2004; Wong et al.,<br>2003                                                     |
| Casein Kinase 1               | PDZ                      | IP<br>GST-pulldown                                  | Agonist                | Cytoplasmic<br>Nuclear             | GOF: canonical<br>LOF: canonical<br>DN: canonical                                                | Peters et al., 1999; Sakanaka et<br>al., 1999                                               |
| Casein Kinase 2               | PDZ                      | Biochemical<br>purification<br>IP<br>GST-pulldown   | Agonist                | Cytoplasmic<br>Nuclear             | GOF: canonical                                                                                   | Willert et al., 1997                                                                        |
| GSK3-binding protein/<br>FRAT | PDZ                      | Yeast two hybrid<br>IP                              | Agonist                | Cytoplasmic                        | GOF: canonical<br>LOF: canonical                                                                 | Li et al., 1999; Yost et al., 1998                                                          |
| Frodo                         | PDZ                      | Yeast two hybrid<br>IP                              | Agonist                | Unknown                            | GOF: canonical<br>LOF: canonical<br>DN: canonical                                                | Gloy et al., 2002                                                                           |
| Dapper                        | PDZ                      | Yeast two hybrid<br>IP <sup>‡</sup><br>GST-pulldown | Antagonist             | Cytoplasmic<br>Nuclear?            | GOF: canonical<br>LOF: canonical/PCP<br>DN: canonical                                            | Cheyette et al., 2002                                                                       |
| IDAX                          | PDZ                      | Yeast two hybrid<br>IP<br>GST-pulldown              | Antagonist             | Cytoplasmic                        | GOF: canonical<br>LOF: canonical<br>DN: canonical                                                | Hino et al., 2001                                                                           |
| Naked Cuticle                 | PDZ                      | Yeast two hybrid<br>IP                              | Antagonist             | Cytoplasmic                        | GOF: canonical/PCP<br>LOF: canonical<br>DN: canonical                                            | Rousset et al., 2001; Wharton et<br>al., 2001                                               |
| Strabismus                    | PDZ                      | IP<br>GST-pulldown                                  | Agonist/<br>Antagonist | Membrane                           | GOF: PCP<br>LOF: PCP<br>DN: PCP                                                                  | Bastock et al., 2003; Jessen et<br>al., 2002; Park and Moon,<br>2002; Wolff and Rubin, 1998 |

Table 1 continued on next page.

effectively inhibits canonical WNT signaling downstream of the WNT/FZ/LRP complex in *Drosophila* embryos and *Xenopus* animal cap explants (Axelrod et al., 1998; Tamai et al., 2000). The PDZ domain of Dishevelled is the region most often found to interact with Dishevelled-binding proteins (note, most such studies actually use the PDZ, and also some flanking, sequence). This central PDZ domain functions in both the canonical and non-canonical pathways. Through its interactions with the Dishevelled-binding partners, the PDZ domain has been proposed to function as the switch between the downstream pathways, depending on the binding partners that engage with it. Factors such as DAAM1, Strabismus, Prickle, Diego, and PAR1 can bind to the PDZ domain, and each functions in PCP signaling. Conversely, Casein kinase, GSK3, GBP/FRAT (GSK3 Binding Protein/Frequently Rearranged in T-Cell Lymphoma), Frodo, Dapper, Naked cuticle (NKD), Protein phosphatase 2, IDAX (Inhibitor of Dishevelled and Axin) and Dapple each associate with the PDZ domain and function in canonical signaling.

The DEP domain functions in non-canonical signaling. This

domain associates with, and mediates the activation of, the small GTPase RAC, which in turn leads to the activation of JUN kinase (Boutros et al., 1998; Habas et al., 2003; Li et al., 1999b). The requirement for the DEP domain in PCP is probably related to the fact that this region associates with RAC (Habas et al., 2003). The DEP domain also plays a central role in the cytoplasmic-to-membrane translocation of Dishevelled in response to WNT signaling or Frizzled overexpression (Axelrod et al., 1998; Krasnow et al., 1995; Pan et al., 2004; Rothbächer et al., 2000), but the mechanism by which this occurs and the protein factors required remain unknown.

#### Subcellular localization

Another mechanism by which Dishevelled specificity could be achieved is via its discrete subcellular localization. In *Drosophila*, some studies indicate that cytoplasmic Dishevelled is involved in canonical WNT signaling, whereas membrane-localized Dishevelled is important for PCP signaling (Axelrod et al., 1998). Conversely, the activation of

Table 1. Continued

| Component              | Dishevelled domain bound | Binding assay <sup>†</sup>                        | Role               | Cellular localization   | Pathway function                                                                         | Reference                                                       |
|------------------------|--------------------------|---------------------------------------------------|--------------------|-------------------------|------------------------------------------------------------------------------------------|-----------------------------------------------------------------|
| PAR1                   | PDZ                      | Biochemical purification IP                       | Agonist/antagonist | Cytoplasmic?            | PAR1BY GOF: PCP<br>PAR1BY LOF: PCP<br>PAR1A/BX GOF: canonical<br>PAR1A/BX LOF: canonical | Ossipova et al., 2005; Sun et al., 2001                         |
| Diego/Diversin         | PDZ                      | IP                                                | Agonist/Antagonist | Cytoplasmic             | GOF: canonical + PCP<br>LOF: PCP                                                         | Jenny et al., 2005                                              |
| Protein Phosphatase 2C | PDZ                      | IP                                                | Agonist            | Cytoplasmic             | GOF: canonical                                                                           | Ratcliffe et al., 2000; Strovel et al., 2000; Yang et al., 2003 |
| Notch                  | PDZ                      | Yeast two hybrid IP                               | ND                 | ND                      | ND                                                                                       | Axelrod et al., 1996                                            |
| EPS8                   | PDZ                      | IP                                                | Unknown            | Cytoplasmic?            | Unknown                                                                                  | Inobe et al., 1999                                              |
| Daple                  | PDZ                      | Yeast two hybrid IP<br>Pull-down assay            | Agonist            | Unknown                 | GOF: canonical + PCP                                                                     | Oshita et al., 2003                                             |
| DAAM1                  | PDZ<br>DEP               | Yeast two hybrid IP <sup>‡</sup><br>GST-pull-down | Agonist            | Cytoplasmic<br>Membrane | GOF: PCP<br>LOF: PCP<br>DN: PCP                                                          | R.H., unpublished                                               |
| Prickle                | DEP                      | IP<br>GST-pull-down                               | Agonist            | Cytoplasmic<br>Membrane | GOF: PCP<br>LOF: PCP<br>DN: PCP                                                          | Jenny et al., 2005; Tree et al., 2002                           |
| MuSK                   | DEP                      | Yeast two hybrid IP <sup>‡</sup><br>GST-pull-down | Agonist            | Cytoplasmic<br>Membrane | Acetylcholine receptor clustering                                                        | Luo et al., 2002                                                |
| Disabled 2             | DEP                      | IP                                                | Antagonist         | Membrane                | GOF: canonical<br>LOF: canonical                                                         | Hocevar et al., 2003                                            |
| EphrinB1               | Full length              | IP<br>GST-pull-down                               | Agonist?           | Membrane                | GOF: PCP?                                                                                | Tanaka et al., 2003                                             |
| PKC $\delta$           | Full length              | IP                                                | Agonist            | Cytoplasmic<br>Membrane | LOF: PCP<br>DN: PCP                                                                      | Kinoshita et al., 2003                                          |
| NET1                   | Full length              | IP                                                | Antagonist?        | Cytoplasmic             | GOF: PCP                                                                                 | Miyakoshi et al., 2004                                          |
| $\beta$ -Arrestin      | Full length              | IP                                                | Unknown            | Cytoplasmic             | GOF: receptor internalization                                                            | Chen et al., 2003                                               |

\*A list of proteins that bind to Dishevelled, their region of interaction with Dishevelled and the binding assays used to detect interactions, the cellular localizations of the proteins and their function in which branch of the WNT pathway.

<sup>†</sup>Immunoprecipitation (IP) assays were performed using epitope-tagged protein, whereas GST-pull-down was performed using purified protein, unless stated otherwise.

<sup>‡</sup>Assay performed using both epitope-tagged and endogenous protein.

AchR, acetylcholine receptor; DN, dominant negative; GOF, gain of function; GST, Glutathione-S-Transferase-fusion protein; IDAX, Inhibitor of Dishevelled and Axin; IP, immunoprecipitation; LOF, loss of function; ND, not done; PAR1A/BX, Partitioning Defective 1A/BX; PAR1BY, Partitioning Defective 1BY.

canonical WNT signaling is also associated with the membrane translocation of Dishevelled (Boutros et al., 2000; Yanagawa et al., 1995). Moreover, a recent study has shown that the localization of Dishevelled to apical versus basolateral membrane, rather than to membrane versus cytoplasm, influences pathway specificity (Wu et al., 2004). Indeed, this study showed that the pool of available Dishevelled is limiting, such that activation of one pathway sequesters Dishevelled in a particular location, leaving it unavailable to activate the other pathway (Wu et al., 2004). This finding may explain results that show that the activation of a non-canonical WNT pathway can downregulate canonical signaling, and vice-versa (Axelrod et al., 1998; Torres et al., 1996; Wu et al., 2004).

Clearly, binding partners and subcellular localization will be interdependent. In *Drosophila* wing epithelia, both pathway specificity and subcellular localization of Dishevelled can be

directed by the cytoplasmic portions of distinct Frizzled receptors (Boutros et al., 2000; Wu et al., 2004). Frizzled receptors that are localized apically recruit Dishevelled to the apical plasma membrane and specifically transduce PCP signals, whereas canonical WNT signals use Frizzled receptors that are localized basolaterally and recruit Dishevelled to the basolateral membrane (Strigini and Cohen, 2000; Wu et al., 2004). It is likely that the mechanisms of Dishevelled pathway specificity will be cell-type and context dependent, and it will be interesting in the future to see whether a related mechanism of signal discrimination is at work in mesenchymal cells. For example, cells in *Xenopus* or zebrafish gastrula mesoderm have no defined apical or basolateral regions, yet still respond to both canonical and non-canonical WNT signals during gastrulation (see below).

In fact, the role of the subcellular localization of Dishevelled

in vertebrates remains poorly understood. The membrane translocation of Dishevelled is a commonly reported consequence of the activation of canonical WNT signaling in vertebrate cultured cells and in *Xenopus* animal caps (Boutros et al., 2000; Choi and Han, 2005; Steitz et al., 1996; Umbhauer et al., 2000; Yang-Snyder et al., 1996). By contrast, exposure of embryonic mouse kidney mesenchyme to WNT1 results in the accumulation of Dishevelled in and around the nucleus (Torres and Nelson, 2000). Additionally, the association of Dishevelled with punctate intracellular vesicles was found to be required for canonical WNT signaling in Chinese hamster ovary (CHO) culture cells (Capelluto et al., 2002) and in *Xenopus* animal caps (Choi and Han, 2005). However, in HEK293 cells (a human embryonic kidney cell line), such punctate localization of Dishevelled correlates with decreased canonical WNT signaling (Cong et al., 2004a). Finally, in the mesoderm of gastrulating *Xenopus* embryos, Dishevelled is localized to the plasma membrane in cells undergoing convergent extension, but not in other cells (Wallingford et al., 2000).

Three very recent studies have further highlighted the interplay between Dishevelled's binding partners and its subcellular localization during vertebrate convergent extension. One study revealed that the phosphorylation of Dishevelled by different isoforms of PAR1 in *Xenopus* resulted in the transduction of either canonical WNT or PCP signals (Ossipova et al., 2005). Notably, phosphorylation by the PCP-specific isoform of PAR1 was associated with the translocation of Dishevelled to the cell membrane. When such phosphorylation was blocked, Dishevelled failed to accumulate at the membrane and PCP signaling was disrupted (Ossipova et al., 2005). Consistent with this result, another study used engineered constructs to sequester Dishevelled at specific sites in the cell, so demonstrating that the membrane localization of Dishevelled is essential for PCP signaling (Park et al., 2005). By contrast, the particular subcellular location of Dishevelled did not influence the activation of canonical WNT signaling. Instead, constructs that caused Dishevelled to be sequestered to either the cell membrane or to the mitochondrial membrane were more active in canonical signaling than was an equivalent amount of wild-type Dishevelled (Park et al., 2005). The final study showed that inversin, a vertebrate ortholog of the *Drosophila* PCP effector Diego, activates PCP signaling and simultaneously downregulates canonical WNT signaling by targeting Dishevelled for proteasome-mediated degradation. Intriguingly, these authors show that membrane-targeted Dishevelled is protected from such degradation (Simons et al., 2005).

### The biology of Dishevelled signaling

In this section, we focus on the biological processes that are governed by the many signaling capabilities of Dishevelled. We start with a summary of classical settings in which Dishevelled function has been studied, and proceed to more recently described functions.

#### *Drosophila* segment polarity

Dishevelled was first identified in *Drosophila* as a viable mutant that had obvious defects in the orientation of the bristles on the wing and thorax of the fly (Fahmy and Fahmy, 1959). Dishevelled was also identified in later genetic screens

in which removal of the maternal/zygotic product phenocopied Wingless and Armadillo/ $\beta$ -Catenin mutants, indicating that Dishevelled has an early critical function in larval patterning in *Drosophila* (Fig. 3A,B) (Nusslein-Volhard and Wieschaus, 1980; Perrimon and Mahowald, 1987). This role and Dishevelled's placement in the Wingless/WNT pathway was demonstrated by additional studies in the fly embryo (Couso et al., 1994; Noordermeer et al., 1994; Riggelman et al., 1990; Siegfried et al., 1994) and wing (e.g. Heslip et al., 1997).

#### Vertebrate dorsoventral axis patterning

The *Xenopus* model system has been pivotal in uncovering the mechanism of WNT/Dishevelled signaling in early pattern formation during vertebrate embryogenesis (Fig. 3C,D) (Harland and Gerhart, 1997). An endogenous complex, which translocates to the future dorsalizing center of the early frog embryo, does indeed contain Dishevelled (Miller et al., 1999b). The translocation of Dishevelled and other factors likely restricts  $\beta$ -Catenin activation to the future dorsal region (Larabell et al., 1997). Recently, *Xwnt11* was shown to be expressed maternally and to translocate dorsally during cortical rotation, probably completing the picture of how the canonical WNT pathway specifies dorsal fates (Tao et al., 2005).

A word of caution must be inserted here. No complete loss-of-function study of *Xenopus* Dishevelled has been reported. Therefore, its requirement for early patterning remains a thorny issue. Indeed, mutant mice lacking both *dvl1* and *dvl2* have revealed a requirement for Dishevelled during neural fold closure and cardiac development, but not during early axial patterning (Hamblet et al., 2002; Lijam et al., 1997). Nonetheless, a Dishevelled-mediated system of early axis patterning appears to be very ancient and is implicated not only in *Xenopus*, but also in sea urchins and even hydrzoans (Hobmayer et al., 2000; Weitzel et al., 2004).

#### *Drosophila* wing hair polarity

The hairs and bristles that cover the body and wings of insects are highly polarized; all point posteriorly on the body and distally on the wing. This issue attracted attention as early as 1940 (Wigglesworth, 1940), and subsequently became a topic of much broader interest (for reviews, see Adler, 1992; Lawrence, 1973).

Early studies suggested that polarity information is provided by a supracellular gradient of spatial information (non-cell autonomous), and that a cell-autonomous mechanism also acts to maintain cell polarity (see Wigglesworth, 1959). Evidence that Dishevelled is a crucial player in this latter process came from the observation that disruptions of its function disturbed the establishment of planar polarity. The *dsh<sup>1</sup>* allele, which harbors a mutation in the DEP domain, disrupts the polarity of wing hairs, abdominal bristles, and bracts on the legs (Theisen et al., 1994). Although mutation of the Frizzled receptor results in non-cell-autonomous defects in planar polarity (Vinson and Adler, 1987), Dishevelled affects planar polarity in a purely cell-autonomous manner (Klingensmith et al., 1994; Theisen et al., 1994).

In the case of wing hairs, planar polarity is established by the outgrowth of an actin-rich prehair exclusively from the distal vertex of each cell (Fig. 4A,B,E) (Wong and Adler, 1993). Directed actin polymerization at the distal vertex



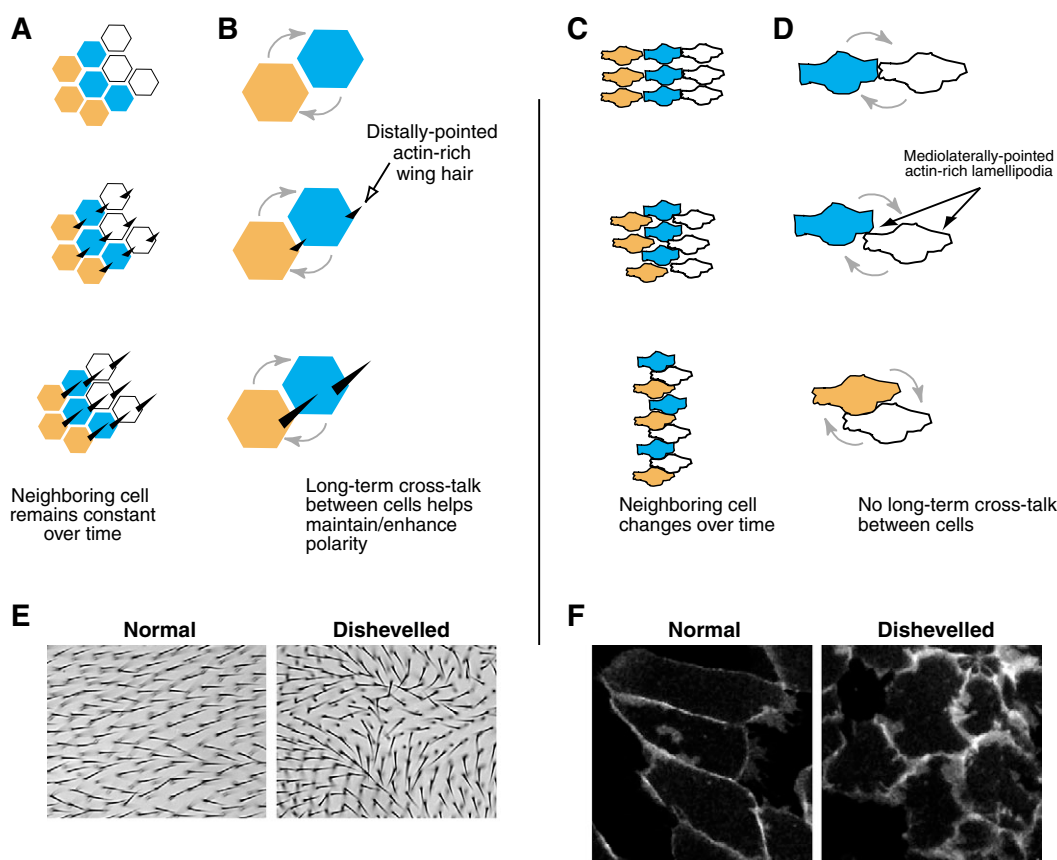

**Fig. 4.** Dishevelled-dependent PCP signaling governs cell polarity. (A) A schematic of planar polarity establishment in the *Drosophila* wing (a higher magnification view is shown in B). Dishevelled-dependent PCP signaling coordinates the orientation of distally pointing, actin-rich hairs in these cells. The arrangement of these cells remains constant, and long-term cross-talk between neighboring cells is essential for polarity establishment. (C) A schematic of planar polarity during convergent extension in *Xenopus* (a higher magnification view is shown in D). Convergent extension is driven by polarized cell interdigitation. By crawling between one another along a single axis, the population of cells is converted from being short and wide to long and narrow. Dishevelled-dependent PCP signaling is essential to the stabilization of lamellipodia specifically on the mediolateral faces of these cells. Unlike *Drosophila* wing cells, these cells are constantly changing neighbours. How the PCP signaling cascade has changed to accommodate this dynamic situation is a topic of great interest. (E) Wing hairs on a normal *Drosophila* embryo all point distally, but such polarity is perturbed in an embryo with disrupted Dishevelled signaling (images courtesy of Jeff Axelrod, Stanford University School of Medicine). (F) *Xenopus* mesoderm cells engaged in convergent extension are aligned and polarized, but this polarity is perturbed in an embryo with disrupted Dishevelled signaling.

governs hair outgrowth. In *Dishevelled* mutant flies, the abnormal positioning of prehairsts presages the disrupted polarity of the hairs themselves (Wong and Adler, 1993). This fundamental finding suggested that *Dishevelled* controls actin polymerization. Importantly, *Dishevelled* protein accumulates asymmetrically at the site of prehair initiation (Axelrod, 2001).

The planar polarity of *Drosophila* wing cells has become a gold standard for studies of PCP signaling, perhaps in part because of the ‘simplicity’ of the system: the polarization of individual, monopolar cells that maintain a constant relationship with their neighbors (Fig. 4A,B). Indeed, much of what we know about the mechanisms of *Dishevelled* function and PCP signaling comes from studies in the fly wing. Continued investigations in this system will certainly help to elucidate the molecular basis of *Dishevelled* function.

#### *Drosophila* ommatidial polarity

*Dishevelled* is also required for planar polarity in the eye, where

polarity is manifested by groups of cells, rather than by individual ones. To add another layer of complexity, each ommatidium is itself asymmetric. As such, polarity in the eye is manifested by the chirality or handedness of each ommatidial cluster, and also by the orientation of the overall cluster. Mutants have revealed that *Dishevelled* is necessary for both normal chirality and normal overall orientation (Theisen et al., 1994). Despite early suggestions to the contrary, several additional genetic studies have demonstrated that *Dishevelled* signals through the PCP cascade to control these aspects of ommatidial planar polarity (Boutros et al., 1998; Zheng et al., 1995).

Interestingly, the chirality of ommatidia depends upon a fate choice in the R3/R4 pair of photoreceptor cells, which in turn depends upon the modulation of Notch signaling downstream of a *Dishevelled*-mediated PCP signal (Cooper and Bray, 1999; Fanto and Mlodzik, 1999; Strutt et al., 2002). In fact, there has been at least one report of a physical association between *Dishevelled* and Notch (Axelrod et al., 1996). This is an area of future interest, as PCP signaling in the eye is fundamentally

different from that in the wing. It also remains unclear whether such a PCP/Notch interaction occurs during vertebrate development.

### Vertebrate gastrulation

The first vertebrate process in which Dishevelled was found to govern planar cell polarity was convergent extension, a morphogenetic tissue movement involving simultaneous lengthening and narrowing of a tissue (Fig. 4C). This process involves the planar polarization of a sheet of cells, where polarity is manifested by stable lamellipodia that form specifically on the mediolateral faces of the cells, but not on anteroposterior faces (Fig. 4C,D,F). These mediolaterally oriented lamellipodia exert tension on neighboring cells, resulting in cell interdigitation (Fig. 4C,D,F) (Keller, 2002; Wallingford et al., 2002).

Dishevelled was implicated in convergent extension (Sokol, 1996), and later studies revealed that Dishevelled functioned in a PCP-like pathway to govern convergent extension in both frogs and fish (Heisenberg et al., 2000; Tada and Smith, 2000; Wallingford et al., 2000). Time-lapse imaging of cells revealed that Dishevelled has a conserved role in controlling cell polarity: disrupting XDSH function randomizes the normally polarized lamellipodial protrusions that drive convergent extension (Wallingford et al., 2000). As is the case for actin-rich prehairsts in the fly wing, XDSH accumulates in the actin-rich lamellipodia of cells undergoing convergent extension (Kinoshita et al., 2003).

The importance of convergent extension for gastrulation is unlikely to be limited to fish and frogs (Solnica-Krezel, 2005). Indeed, the disruption of Dishevelled function inhibits convergent extension in the ascidian, a non-vertebrate chordate (Keys et al., 2002). Likewise, the importance of Dishevelled function during gastrulation is not limited to convergent extension. Studies indicate that Dishevelled signaling via the PCP cascade may govern several other cell behaviors during *Xenopus* and zebrafish morphogenesis (e.g. Ewald et al., 2004; Marsden and DeSimone, 2001; Matsui et al., 2005). Dishevelled may also signal via the WNT/Ca<sup>2+</sup> pathway to govern additional aspects of amphibian gastrulation (Winklbauer et al., 2001). Future studies should aim to find the unifying features of the cellular events that are governed by this protein.

### Neural tube closure

Convergent extension not only drives gastrulation, but also occurs during neural tube closure in vertebrate animals, including amphibians, chick and mice (Jacobson and Gordon, 1976; Keller et al., 1992; Lawson et al., 2001; Sulik et al., 1994; Van Straaten et al., 1996). Dishevelled is essential for the convergent extension of neural tissue (Wallingford and Harland, 2001). Moreover, disrupting Dishevelled function in *Xenopus* has demonstrated that midline convergent extension is a critical aspect of neural tube closure; it narrows the distance between the forming neural folds and facilitates neural fold apposition and fusion (Wallingford and Harland, 2002). This mechanism is conserved across vertebrates, as disrupting mouse *dvl1* and *dvl2* genes also causes neural tube closure defects (Hamblet et al., 2002). Importantly, the phenotype of DVL mutant mice is reminiscent of a severe human neural tube closure defect called craniorachischisis (Kirillova et al., 2000; Saraga-Babic et al., 1993).

### Directed migration of individual cells

Since the initial finding that a vertebrate cognate of the PCP cascade governs cell polarity in vertebrates, many PCP genes identified in *Drosophila* have been examined in vertebrates and have been found to influence convergent extension (Mlodzik, 2002; Wallingford et al., 2002). Despite the similarities, there is a crucial difference in the functioning of the PCP cascade in *Drosophila* and in vertebrate convergent extension. In flies, cross-talk between neighboring cells via PCP signaling components allows feedback amplification that reinforces the polarity decision (Fig. 4A,B) (Tree et al., 2002). During convergent extension, the vertebrate PCP pathway coordinates movement in a population of cells that are constantly changing neighbors; therefore, no long-term reinforcement of polarity from a particular neighboring cell is possible (Fig. 4C,D).

The highly dynamic nature of vertebrate PCP signaling is highlighted by the finding that a loss of Dishevelled function disrupts not only cell polarity during convergent extension but also lamellipodial stability (Wallingford et al., 2000). Indeed, several recent studies demonstrate that Dishevelled controls dynamic cell protrusions not only during polarized cell movements of large tissue sheets, but also during directed migration of individual cells.

Foremost among these is the finding that Dishevelled-dependent PCP signaling governs the directed migration, but not the specification, of *Xenopus* neural crest cells (De Calisto et al., 2005). Additional studies suggest that such a function for Dishevelled is widely used. For example, Dishevelled is essential for the directed migration of CHO cells during wound healing (Endo et al., 2005), and PCP signaling (and thus very likely Dishevelled) governs the migration of cardiomyocytes during the development of the outflow tracts of the heart (Phillips et al., 2005) (see also Hamblet et al., 2002).

Importantly, time-lapse studies in a variety of cell types hint at the mechanism by which Dishevelled contributes to directed cell migration. During convergent extension, cells lacking Dishevelled function are not only de-polarized, but their lamellipodial protrusions become highly unstable (Wallingford et al., 2000). Likewise, Dishevelled is required to stabilize leading-edge lamellipodia in migrating neural crest cells (De Calisto et al., 2005). A similar effect was recently reported in post-embryonic cells; disruption of DVL2 function with siRNA in bovine arterial endothelial cells caused lamellipodia to undergo rapid extension and retraction (Wechezak and Coan, 2005). Finally, a strong correlation between Dishevelled function and the stability of cell protrusions has been observed in cultured Saos-2 cells (a human osteogenic sarcoma-derived cell line) (Wiggin and Hamel, 2002).

This role is not limited to vertebrates. In the *Drosophila* ovary, Dishevelled is required for proper cell migration during ovariolar morphogenesis (Cohen et al., 2002). In this case, WNT, Frizzled and Dishevelled are involved, but other components of the PCP or canonical WNT pathways are not. As in vertebrates, this defect in cell migration does not result from defective polarity, but rather from the inability of cells to move productively (Cohen et al., 2002). This phenotype in the *Drosophila* ovary correlates with a failure to accumulate focal adhesion kinase (Cohen et al., 2002), raising the possibility that cross-talk occurs between Dishevelled and the adhesion machinery of a cell. Notably, adhesion to fibronectin has been

found to cause Dishevelled to translocate to the cell membrane (Marsden and DeSimone, 2001), and Dishevelled also associates with Ephrins and Eph receptors (Tanaka et al., 2003).

So far, the studies of Dishevelled function in individual cell migration demonstrate a role in stabilizing protrusions. Future studies should determine whether or not Dishevelled also plays a role in orienting the leading edge of migratory cells. It will also be of interest to determine whether other PCP genes share this functionality with Dishevelled, and to elucidate the ways in which this signaling cascade has changed to accommodate the dynamic nature of motile cells. In light of these findings, it is interesting to note that, from studies of planar polarization of the insect denticle following wounding, Nubler-Jung and colleagues presciently commented many years ago that 'cell migration and denticle formation may thus share similar orienting mechanisms' (Nubler-Jung et al., 1987). It will be important now to learn just how similar these mechanisms really are.

### Polarized cell division

Polarized cell divisions contribute to morphogenesis in a wide variety of systems, and Dishevelled controls division polarity in several cell types. What is peculiar is that Dishevelled may direct oriented cell divisions through multiple, highly divergent mechanisms.

Dishevelled was first implicated in governing the orientation of cytokinesis in *Drosophila* sensory organ precursor cells. These cells divide in the plane of the epithelium, oriented along the anteroposterior axis, but this polarity is randomized when Dishevelled is disrupted (Gho and Schweisguth, 1998). Because the PCP-specific *dsh<sup>1</sup>* allele or mutations in other PCP genes (e.g. *flamingo*) disrupt this polarity, it is likely that Dishevelled signals via a PCP cascade to control these polarized cell divisions (Bellaiche et al., 2001; Gho and Schweisguth, 1998; Lu et al., 1999).

This aspect of Dishevelled function is conserved in vertebrates; a recent study found that dominant-negative Dishevelled constructs disrupt polarized cell divisions in the gastrulating zebrafish. Here, again, Dishevelled acts in a PCP-like signaling cascade, as manipulation of the PCP effector Strabismus/Vangl2 also randomizes these normally polarized divisions (Gong et al., 2004).

Dishevelled also controls a variety of polarized cell divisions in the developing *Caenorhabditis elegans* embryo. Curiously, the orientation of these mitoses requires Frizzled, Dishevelled and GSK-3, but not other components of the WNT or PCP pathways (Chang et al., 2005; Schlesinger et al., 1999; Walston et al., 2004).

Cell division orientation is coordinated by microtubules in the mitotic spindles and asters (e.g. Bellaiche et al., 2001; Kaltschmidt et al., 2000). It is therefore intriguing that Dishevelled can regulate microtubule stability via GSK3 (Ciani et al., 2004; Krylova et al., 2000). Indeed, GSK-3 has been shown to be an essential mediator of normal mitotic spindle dynamics (Wakefield et al., 2003). This aspect of Dishevelled function is only just emerging, but should be of particular interest, as it may represent yet another branch of Dishevelled signaling.

### Cardiac development

Following the establishment of the body axis, Dishevelled

signaling is re-used during organogenesis. For example, several studies implicate WNT signaling in the control of cardiac development (Olson and Schneider, 2003), and all three major branches of Dishevelled signaling appear to be involved.

The canonical WNT/ $\beta$ -catenin pathway can negatively regulate cardiogenesis at an early stage by suppressing the differentiation of the cardiomyocyte precursors derived from the mesoderm (Lickert et al., 2002; Tzahor and Lassar, 2001). By contrast, a DVL2-dependent WNT signal also triggers a cascade of signals through  $\beta$ -catenin, PITX2 and Cyclin D2 to promote cell proliferation within the cardiac outflow tract (Kioussi et al., 2002). Interestingly, the outflow tract defects in *Pitx2* knockout mice resemble those in *Dvl2* knockout mice (Hamblet et al., 2002).

This last result suggests that the only role for DVL2 in heart development may be to signal through  $\beta$ -catenin and activate gene expression. However, it is likely that DVL2 also transduces crucial PCP signals during outflow tract development, as the PCP effector Strabismus/Vangl2 is required for the proper migration of cardiomyocytes during the development of the outflow tracts of the heart (Phillips et al., 2005).

Finally, studies have shown that, in *Xenopus*, WNT11 controls early differentiation and morphogenesis in the heart (Pandur et al., 2002). In this setting, WNT11 acts through the DEP and PDZ domains of Dishevelled to activate PKC and then JNK (Garriock et al., 2005; Pandur et al., 2002), suggesting that the WNT/ $\text{Ca}^{2+}$  pathway may be involved. Additional studies will be necessary to pare out which pathways are influencing which aspects of cardiac development.

### Vertebrate neuronal development and social behavior

Mice lacking DVL1 exhibit defects in social behavior, such as in sleeping behavior, nest building and whisker trimming (Lijam et al., 1997; Long et al., 2004), although the mechanism underlying this phenotype remains elusive. The canonical WNT pathway plays a role in the development and patterning of the brain. In fact, it has been reported that Dishevelled can convert naive ectoderm into neural tissue (Sokol et al., 1995), an effect that is likely to be mediated by the ability of canonical WNT signaling to repress BMP transcription in the ectoderm (Baker et al., 1999). A more established role for canonical WNT signaling is in neural patterning, where WNT signals posteriorize neural ectoderm, generating anteroposterior pattern in the central nervous system (McGrew et al., 1997; McGrew et al., 1995). Indeed, Dishevelled has the ability to mediate this transformation (Itoh and Sokol, 1997).

Dishevelled also appears to be important for later events in neural development, governing the morphology, differentiation and function of neurons in vertebrates (e.g. Fan et al., 2004; Kishida et al., 2004; Luo et al., 2002; Schulte et al., 2005). In particular, two studies highlight Dishevelled's ability to wear more than one hat. First, it has been shown that the atypical receptor tyrosine kinase RYK can act as a WNT co-receptor (Lu et al., 2004a). RYK forms a complex with Frizzled and WNT, and also with Dishevelled, to transduce a canonical WNT signal that is important for normal neurite outgrowth from dorsal root ganglia, and for the guidance of axons in the craniofacial motor nerves and the ophthalmic nerves in the mouse (Lu et al., 2004a).

In the second study, DVL1 was found to control the complexity of dendritic arbors in hippocampal neurons (Rosso et al., 2005). In this capacity, DVL1 signals via a PCP cascade, collaborating with WNT7b, RAC and JNK. Strikingly, in these neurons, DVL1 was found to co-localize with microtubules in the axons and with actin in cellular protrusions at the leading edge of extending neurons (Rosso et al., 2005). This latter association may be related to the effects of Dishevelled on lamellipodial stability (e.g. De Calisto et al., 2005; Wallingford et al., 2000; Wechezak and Coan, 2005), whereas the former may be related to the ability of Dishevelled to regulate microtubule stability (e.g. Ciani et al., 2004; Krylova et al., 2000). Further studies of the function of Dishevelled in neuronal development and function should be both illuminating and important.

## Conclusion

Dishevelled signaling is an important regulator of a wide variety of signaling pathways and thus governs many important developmental processes. Some of these roles are very highly conserved across species, whereas others are not. In some cases, similar biological processes appear to require Dishevelled, but they need it to signal along divergent pathways. As we move forward, care should be taken. We should endeavor to find unifying features that will help us to understand this protein. But we should also be ready for the surprises that may be lurking in the next experiment.

We thank J. Klingensmith, P. Lawrence, I. Quigley and the anonymous reviewers for help while writing this manuscript, and Jeff Axelrod and Keith Wharton for contributing images. R.H. is supported by a Basil O'Connor Starter Scholar Award, a Scientist Development Grant from the American Heart Association, and a Seed Grant from the Foundation of UMDNJ. J.B.W. is supported by a Burroughs Wellcome Fund Career Award and the NIH.

## References

- Aberle, H., Bauer, A., Stappert, J., Kispert, A. and Kemler, R. (1997).  $\beta$ -catenin is a target for the ubiquitin-proteasome pathway. *EMBO J.* **16**, 3797-3804.
- Adler, P. N. (1992). The genetic control of tissue polarity in Drosophila. *BioEssays* **14**, 735-741.
- Amit, S., Hatzubai, A., Birman, Y., Andersen, J. S., Ben-Shushan, E., Mann, M., Ben-Neriah, Y. and Alkalay, I. (2002). Axin-mediated CKI phosphorylation of  $\beta$ -catenin at Ser 45, a molecular switch for the Wnt pathway. *Genes Dev.* **16**, 1066-1076.
- Axelrod, J. D. (2001). Unipolar membrane association of Dishevelled mediates Frizzled planar cell polarity signaling. *Genes Dev.* **15**, 1182-1187.
- Axelrod, J. D., Matsuno, K., Artavanis-Tsakonas, S. and Perrimon, N. (1996). Interaction between Wingless and Notch signaling pathways mediated by dishevelled. *Science* **271**, 1826-1832.
- Axelrod, J. D., Miller, J. R., Shulman, J. M., Moon, R. T. and Perrimon, N. (1998). Differential recruitment of Dishevelled provides signaling specificity in the planar cell polarity and Wingless signaling pathways. *Genes Dev.* **12**, 2610-2622.
- Baker, J. C., Beddington, R. S. and Harland, R. M. (1999). Wnt signaling in Xenopus embryos inhibits bmp4 expression and activates neural development. *Genes Dev.* **13**, 3149-3159.
- Bastock, R., Strutt, H. and Strutt, D. (2003). Strabismus is asymmetrically localised and binds to Prickle and Dishevelled during Drosophila planar polarity patterning. *Development* **130**, 3007-3014.
- Bellaiche, Y., Gho, M., Kaltschmidt, J. A., Brand, A. H. and Schweisguth, F. (2001). Frizzled regulates localization of cell-fate determinants and mitotic spindle rotation during asymmetric cell division. *Nat. Cell Biol.* **3**, 50-57.
- Bien, M. and Clevers, H. (2003). Armadillo/ $\beta$ -catenin signals in the nucleus – proof beyond a reasonable doubt? *Nat. Cell Biol.* **5**, 179-182.
- Boutros, M., Paricio, N., Strutt, D. I. and Mlodzik, M. (1998). Dishevelled activates JNK and discriminates between JNK pathways in planar polarity and wingless signaling. *Cell* **94**, 109-118.
- Boutros, M., Mihaly, J., Bouwmeester, T. and Mlodzik, M. (2000). Signaling specificity by Frizzled receptors in Drosophila. *Science* **288**, 1825-1828.
- Capelluto, D. G., Kutateladze, T. G., Habas, R., Finkielstein, C. V., He, X. and Overduin, M. (2002). The DIX domain targets dishevelled to actin stress fibres and vesicular membranes. *Nature* **419**, 726-729.
- Chang, W., Lloyd, C. E. and Zarkower, D. (2005). DSH-2 regulates asymmetric cell division in the early C. elegans somatic gonad. *Mech. Dev.* **122**, 781-789.
- Chen, W., ten Berge, D., Brown, J., Ahn, S., Hu, L. A., Miller, W. E., Caron, M. G., Barak, L. S., Nusse, R. and Lefkowitz, R. J. (2003). Dishevelled 2 recruits  $\beta$ -arrestin 2 to mediate Wnt5A-stimulated endocytosis of Frizzled 4. *Science* **301**, 1391-1394.
- Cheyette, B. N., Waxman, J. S., Miller, J. R., Takemaru, K., Sheldahl, L. C., Khlebtsova, N., Fox, E. P., Earnest, T. and Moon, R. T. (2002). Dapper, a Dishevelled-associated antagonist of  $\beta$ -catenin and JNK signaling, is required for notochord formation. *Dev. Cell* **2**, 449-461.
- Choi, S. C. and Han, J. K. (2005). Rap2 is required for Wnt/ $\beta$ -catenin signaling pathway in Xenopus early development. *EMBO J.* **24**, 985-996.
- Chung, H. A., Hyodo-Miura, J., Nagamune, T. and Ueno, N. (2005). FGF signal regulates gastrulation cell movements and morphology through its target NRH. *Dev. Biol.* **282**, 95-110.
- Ciani, L., Krylova, O., Smalley, M. J., Dale, T. C. and Salinas, P. C. (2004). A divergent canonical WNT-signaling pathway regulates microtubule dynamics: dishevelled signals locally to stabilize microtubules. *J. Cell Biol.* **164**, 243-253.
- Cliffe, A., Hamada, F. and Bienz, M. (2003). A role of Dishevelled in relocating Axin to the plasma membrane during wingless signaling. *Curr. Biol.* **13**, 960-966.
- Cohen, E. D., Mariol, M. C., Wallace, R. M., Weyers, J., Kamberov, Y. G., Pradel, J. and Wilder, E. L. (2002). DWnt4 regulates cell movement and focal adhesion kinase during Drosophila ovarian morphogenesis. *Dev. Cell* **2**, 437-448.
- Cong, F. and Varmus, H. (2004). Nuclear-cytoplasmic shuttling of Axin regulates subcellular localization of  $\beta$ -catenin. *Proc. Natl. Acad. Sci. USA* **101**, 2882-2887.
- Cong, F., Schweizer, L. and Varmus, H. (2004a). Casein kinase Iepsilon modulates the signaling specificities of dishevelled. *Mol. Cell Biol.* **24**, 2000-2011.
- Cong, F., Schweizer, L. and Varmus, H. (2004b). Wnt signals across the plasma membrane to activate the  $\beta$ -catenin pathway by forming oligomers containing its receptors, Frizzled and LRP. *Development* **131**, 5103-5115.
- Cooper, M. T. and Bray, S. J. (1999). Frizzled regulation of Notch signalling polarizes cell fate in the Drosophila eye. *Nature* **397**, 526-530.
- Couso, J. P., Bishop, S. A. and Martinez Arias, A. (1994). The wingless signalling pathway and the patterning of the wing margin in Drosophila. *Development* **120**, 621-636.
- De Calisto, J., Araya, C., Marchant, L., Riaz, C. F. and Mayor, R. (2005). Essential role of non-canonical Wnt signalling in neural crest migration. *Development* **132**, 2587-2597.
- Dominguez, I., Itoh, K. and Sokol, S. Y. (1995). Role of glycogen synthase kinase 3 beta as a negative regulator of dorsoventral axis formation in Xenopus embryos. *Proc. Natl. Acad. Sci. USA* **92**, 8498-8502.
- Eaton, S., Wepf, R. and Simons, K. (1996). Roles for Rac1 and Cdc42 in planar polarization and hair outgrowth in the wing of Drosophila. *J. Cell Biol.* **135**, 1277-1289.
- Endo, Y., Wolf, V., Muraiso, K., Kamijo, K., Soon, L., Uren, A., Barshishat-Kupper, M. and Rubin, J. S. (2005). Wnt-3a-dependent cell motility involves RhoA activation and is specifically regulated by dishevelled-2. *J. Biol. Chem.* **280**, 777-786.
- Ewald, A. J., Peyrot, S. M., Tyska, J. M., Fraser, S. E. and Wallingford, J. B. (2004). Regional requirements for Dishevelled signaling during Xenopus gastrulation: separable effects on blastopore closure, mesoderm internalization and archenteron formation. *Development* **131**, 6195-6209.
- Fagotto, F., Jho, E., Zeng, L., Kurth, T., Joos, T., Kaufmann, C. and Costantini, F. (1999). Domains of axin involved in protein-protein interactions, Wnt pathway inhibition, and intracellular localization. *J. Cell Biol.* **145**, 741-756.
- Fahmy, O. G. and Fahmy, M. (1959). New mutant report. *Dros. Inf. Serv.* **33**, 85.
- Fan, S., Ramirez, S. H., Garcia, T. M. and Dewhurst, S. (2004). Dishevelled

- promotes neurite outgrowth in neuronal differentiating neuroblastoma 2A cells, via a DIX-domain dependent pathway. *Brain Res. Mol. Brain Res.* **132**, 38-50.
- Fanto, M. and Mlodzik, M.** (1999). Asymmetric Notch activation specifies photoreceptors R3 and R4 and planar polarity in the *Drosophila* eye. *Nature* **397**, 523-526.
- Fanto, M., Weber, U., Strutt, D. I. and Mlodzik, M.** (2000). Nuclear signaling by Rac and Rho GTPases is required in the establishment of epithelial planar polarity in the *Drosophila* eye. *Curr. Biol.* **10**, 979-988.
- Garrick, R. J., D'Agostino, S. L., Pilcher, K. C. and Krieg, P. A.** (2005). Wnt11-R, a protein closely related to mammalian Wnt11, is required for heart morphogenesis in *Xenopus*. *Dev. Biol.* **279**, 179-192.
- Gho, M. and Schweisguth, F.** (1998). Frizzled signalling controls orientation of asymmetric sense organ precursor cell divisions in *Drosophila*. *Nature* **393**, 178-181.
- Gloy, J., Hikasa, H. and Sokol, S. Y.** (2002). Frodo interacts with Dishevelled to transduce Wnt signals. *Nat. Cell. Biol.* **4**, 351-357.
- Gong, Y., Mo, C. and Fraser, S. E.** (2004). Planar cell polarity signalling controls cell division orientation during zebrafish gastrulation. *Nature* **430**, 689-693.
- Gonzalez-Sancho, J. M., Brennan, K. R., Castelo-Soccio, L. A. and Brown, A. M.** (2004). Wnt proteins induce dishevelled phosphorylation via an LRP5/6-independent mechanism, irrespective of their ability to stabilize  $\beta$ -catenin. *Mol. Cell. Biol.* **24**, 4757-4768.
- Habas, R. and Dawid, I. B.** (2005). Dishevelled and Wnt signaling: is the nucleus the final frontier? *J. Biol.* **4**, 2.
- Habas, R., Kato, Y. and He, X.** (2001). Wnt/Frizzled activation of Rho regulates vertebrate gastrulation and requires a novel Formin homology protein Daam1. *Cell* **107**, 843-854.
- Habas, R., Dawid, I. B. and He, X.** (2003). Coactivation of Rac and Rho by Wnt/Frizzled signaling is required for vertebrate gastrulation. *Genes Dev.* **17**, 295-309.
- Hamblet, N. S., Lijam, N., Ruiz-Lozano, P., Wang, J., Yang, Y., Chien, K. R., Sussman, D. J. and Wynshaw-Boris, A.** (2002). Dishevelled-2 is essential for cardiac outflow tract development, somite segmentation, and neural tube closure. *Development* **129**, 5827-5838.
- Harland, R. and Gerhart, J.** (1997). Formation and function of Spemann's organizer. *Annu. Rev. Cell Dev. Biol.* **13**, 611-667.
- He, X., Semenov, M., Tamai, K. and Zeng, X.** (2004). LDL receptor-related proteins 5 and 6 in Wnt/ $\beta$ -catenin signaling: arrows point the way. *Development* **131**, 1663-1677.
- Heisenberg, C. P., Tada, M., Rauch, G. J., Saude, L., Concha, M. L., Geisler, R., Stemple, D. L., Smith, J. C. and Wilson, S. W.** (2000). Silberblick/Wnt11 mediates convergent extension movements during zebrafish gastrulation. *Nature* **405**, 76-81.
- Heslip, T. R., Theisen, H., Walker, H. and Marsh, J. L.** (1997). Shaggy and dishevelled exert opposite effects on Wingless and Decapentaplegic expression and on positional identity in imaginal discs. *Development* **124**, 1069-1078.
- Hikasa, H., Shibata, M., Hiratani, I. and Taira, M.** (2002). The *Xenopus* receptor tyrosine kinase Xror2 modulates morphogenetic movements of the axial mesoderm and neuroectoderm via Wnt signaling. *Development* **129**, 5227-5239.
- Hino, S., Kishida, S., Michiue, T., Fukui, A., Sakamoto, I., Takada, S., Asashima, M. and Kikuchi, A.** (2001). Inhibition of the Wnt signaling pathway by Idax, a novel Dvl-binding protein. *Mol. Cell. Biol.* **21**, 330-342.
- Hobmayer, B., Rentzsch, F., Kuhn, K., Happel, C. M., von Laue, C. C., Snyder, P., Rothbacher, U. and Holstein, T. W.** (2000). WNT signalling molecules act in axis formation in the diploblastic metazoan *Hydra*. *Nature* **407**, 186-189.
- Hocevar, B. A., Mou, F., Rennolds, J. L., Morris, S. M., Cooper, J. A. and Howe, P. H.** (2003). Regulation of the Wnt signaling pathway by disabled-2 (Dab2). *EMBO J.* **22**, 3084-3094.
- Huang, H. C. and Klein, P. S.** (2004). The Frizzled family: receptors for multiple signal transduction pathways. *Genome Biol.* **5**, 234.
- Inobe, M., Katsube, K., Miyagoe, Y., Nabeshima, Y. and Takeda, S.** (1999). Identification of EPS8 as a Dvl1-associated molecule. *Biochem. Biophys. Res. Commun.* **266**, 216-221.
- Itoh, I., Brott, B. K., Bae, G. U., Ratcliffe, M. J. and Sokol, S.** (2005). Nuclear localization is required for Dishevelled function in Wnt/ $\beta$ -catenin signalling. *J. Biol.* **4**, 3.
- Itoh, K. and Sokol, S. Y.** (1997). Graded amounts of *Xenopus* dishevelled specify discrete anteroposterior cell fates in prospective ectoderm. *Mech. Dev.* **61**, 113-125.
- Itoh, K., Antipova, A., Ratcliffe, M. J. and Sokol, S.** (2000). Interaction of dishevelled and *Xenopus* axin-related protein is required for wnt signal transduction. *Mol. Cell. Biol.* **20**, 2228-2238.
- Jacobson, A. G. and Gordon, R.** (1976). Changes in the shape of the developing vertebrate nervous system analyzed experimentally, mathematically and by computer simulation. *J. Exp. Zool.* **197**, 191-246.
- Jenny, A., Reynolds-Kenneally, J., Das, G., Burnett, M. and Mlodzik, M.** (2005). Diego and Prickle regulate Frizzled planar cell polarity signalling by competing for Dishevelled binding. *Nat. Cell. Biol.* **7**, 691-697.
- Jessen, J. R., Topczewski, J., Bingham, S., Sepich, D. S., Marlow, F., Chandrasekhar, A. and Solnica-Krezel, L.** (2002). Zebrafish trilobite identifies new roles for Strabismus in gastrulation and neuronal movements. *Nat. Cell. Biol.* **4**, 610-615.
- Julius, M. A., Schelbert, B., Hsu, W., Fitzpatrick, E., Jho, E., Fagotto, F., Costantini, F. and Kitajewski, J.** (2000). Domains of axin and dishevelled required for interaction and function in wnt signaling. *Biochem. Biophys. Res. Commun.* **276**, 1162-1169.
- Kaltschmidt, J. A., Davidson, C. M., Brown, N. H. and Brand, A. H.** (2000). Rotation and asymmetry of the mitotic spindle direct asymmetric cell division in the developing central nervous system. *Nat. Cell. Biol.* **2**, 7-12.
- Keller, R.** (2002). Shaping the vertebrate body plan by polarized embryonic cell movements. *Science* **298**, 1950-1954.
- Keller, R., Shih, J. and Domingo, C.** (1992). The patterning and functioning of protrusive activity during convergence and extension of the *Xenopus* organizer. *Dev. Suppl.* 81-91.
- Keys, D. N., Levine, M., Harland, R. M. and Wallingford, J. B.** (2002). Control of intercalation is cell-autonomous in the notochord of *Ciona intestinalis*. *Dev. Biol.* **246**, 329-340.
- Kim, G. H. and Han, J. K.** (2005). JNK and ROK $\alpha$  function in the noncanonical Wnt/RhoA signaling pathway to regulate *Xenopus* convergent extension movements. *Dev. Dyn.* **232**, 958-968.
- Kinoshita, N., Iioka, H., Miyakoshi, A. and Ueno, N.** (2003). PKC delta is essential for Dishevelled function in a noncanonical Wnt pathway that regulates *Xenopus* convergent extension movements. *Genes Dev.* **17**, 1663-1676.
- Kioussi, C., Briata, P., Baek, S. H., Rose, D. W., Hamblet, N. S., Herman, T., Ohgi, K. A., Lin, C., Gleiberman, A., Wang, J. et al.** (2002). Identification of a Wnt/Dvl/ $\beta$ -Catenin $\rightarrow$ Pitx2 pathway mediating cell-type-specific proliferation during development. *Cell* **111**, 673-685.
- Kirillova, I., Novikova, I., Auge, J., Audollent, S., Esnault, D., Encharazavi, F., Lazjuk, G., Attie-Bitach, T. and Vekemans, M.** (2000). Expression of the sonic hedgehog gene in human embryos with neural tube defects. *Teratology* **61**, 347-354.
- Kishida, S., Yamamoto, H., Hino, S., Ikeda, S., Kishida, M. and Kikuchi, A.** (1999). DIX domains of Dvl and axin are necessary for protein interactions and their ability to regulate  $\beta$ -catenin stability. *Mol. Cell. Biol.* **19**, 4414-4422.
- Kishida, S., Yamamoto, H. and Kikuchi, A.** (2004). Wnt-3a and Dvl induce neurite retraction by activating Rho-associated kinase. *Mol. Cell. Biol.* **24**, 4487-4501.
- Klein, T. J. and Mlodzik, M.** (2005). Planar cell polarization: an emerging model points in the right direction. *Annu. Rev. Cell Dev. Biol.* (in press).
- Klingensmith, J., Nusse, R. and Perrimon, N.** (1994). The *Drosophila* segment polarity gene dishevelled encodes a novel protein required for response to the wingless signal. *Genes Dev.* **8**, 118-130.
- Klingensmith, J., Yang, Y., Axelrod, J. D., Beier, D. R., Perrimon, N. and Sussman, D. J.** (1996). Conservation of dishevelled structure and function between flies and mice: isolation and characterization of Dvl2. *Mech. Dev.* **58**, 15-26.
- Krasnow, R. E., Wong, L. L. and Adler, P. N.** (1995). Dishevelled is a component of the frizzled signaling pathway in *Drosophila*. *Development* **121**, 4095-4102.
- Krylova, O., Messenger, M. J. and Salinas, P. C.** (2000). Dishevelled-1 regulates microtubule stability: a new function mediated by glycogen synthase kinase-3 $\beta$ . *J. Cell Biol.* **151**, 83-94.
- Larabell, C. A., Torres, M., Rowning, B. A., Yost, C., Miller, J. R., Wu, M., Kimelman, D. and Moon, R. T.** (1997). Establishment of the dorsoventral axis in *Xenopus* embryos is preaged by early asymmetries in  $\beta$ -catenin that are modulated by the Wnt signaling pathway. *J. Cell Biol.* **136**, 1123-1136.
- Lawrence, P. A.** (1973). The development of spatial patterns in the integument of insects. In *Developmental Systems: Insects* (ed. S. J. Counce and C. H. Waddington), pp. 157-206. New York: Academic Press.

- Lawson, A., Anderson, H. and Schoenwolf, G. C. (2001). Cellular mechanisms of neural fold formation and morphogenesis in the chick embryo. *Anat. Rec.* **262**, 153-168.
- Lee, J. S., Ishimoto, A. and Yanagawa, S. (1999). Characterization of mouse dishevelled (Dvl) proteins in Wnt/Wingless signaling pathway. *J. Biol. Chem.* **274**, 21464-21470.
- Li, L., Yuan, H., Weaver, C. D., Mao, J., Farr, G. H., 3rd, Sussman, D. J., Jonkers, J., Kimelman, D. and Wu, D. (1999a). Axin and Frat1 interact with dvl and GSK, bridging Dvl to GSK in Wnt-mediated regulation of LEF-1. *EMBO J.* **18**, 4233-4240.
- Li, L., Yuan, H., Xie, W., Mao, J., Caruso, A. M., McMahon, A., Sussman, D. J. and Wu, D. (1999b). Dishevelled proteins lead to two signaling pathways. Regulation of LEF-1 and c-Jun N-terminal kinase in mammalian cells. *J. Biol. Chem.* **274**, 129-134.
- Li, L., Mao, J., Sun, L., Liu, W. and Wu, D. (2002). Second cysteine-rich domain of Dickkopf-2 activates canonical Wnt signaling pathway via LRP-6 independently of dishevelled. *J. Biol. Chem.* **277**, 5977-5981.
- Lickert, H., Kutsch, S., Kanzler, B., Tamai, Y., Taketo, M. M. and Kemler, R. (2002). Formation of multiple hearts in mice following deletion of  $\beta$ -catenin in the embryonic endoderm. *Dev. Cell* **3**, 171-181.
- Lijam, N., Paylor, R., McDonald, M. P., Crawley, J. N., Deng, C. X., Herrup, K., Stevens, K. E., Maccaferri, G., McBain, C. J., Sussman, D. J. et al. (1997). Social interaction and sensorimotor gating abnormalities in mice lacking Dvl1. *Cell* **90**, 895-905.
- Liu, C., Li, Y., Semenov, M., Han, C., Baeg, G. H., Tan, Y., Zhang, Z., Lin, X. and He, X. (2002). Control of  $\beta$ -catenin phosphorylation/degradation by a dual-kinase mechanism. *Cell* **108**, 837-847.
- Logan, C. Y. and Nusse, R. (2004). The Wnt signaling pathway in development and disease. *Annu. Rev. Cell Dev. Biol.* **20**, 781-810.
- Long, J. M., LaPorte, P., Paylor, R. and Wynshaw-Boris, A. (2004). Expanded characterization of the social interaction abnormalities in mice lacking Dvl1. *Genes Brain Behav.* **3**, 51-62.
- Lu, B., Usui, T., Uemura, T., Jan, L. and Jan, Y. N. (1999). Flamingo controls the planar polarity of sensory bristles and asymmetric division of sensory organ precursors in Drosophila. *Curr. Biol.* **9**, 1247-1250.
- Lu, W., Yamamoto, V., Ortega, B. and Baltimore, D. (2004a). Mammalian Ryk is a Wnt coreceptor required for stimulation of neurite outgrowth. *Cell* **119**, 97-108.
- Lu, X., Borchers, A. G., Jolicoeur, C., Rayburn, H., Baker, J. C. and Tessier-Lavigne, M. (2004b). PTK7/CCK-4 is a novel regulator of planar cell polarity in vertebrates. *Nature* **430**, 93-98.
- Luo, Z. G., Wang, Q., Zhou, J. Z., Wang, J., Luo, Z., Liu, M., He, X., Wynshaw-Boris, A., Xiong, W. C., Lu, B. et al. (2002). Regulation of AChR clustering by Dishevelled interacting with MusK and PAK1. *Neuron* **35**, 489-505.
- Mao, J., Wang, J., Liu, B., Pan, W., Farr, G. H., 3rd, Flynn, C., Yuan, H., Takada, S., Kimelman, D., Li, L. et al. (2001). Low-density lipoprotein receptor-related protein-5 binds to Axin and regulates the canonical Wnt signaling pathway. *Mol. Cell* **7**, 801-809.
- Marlow, F., Topczewski, J., Sepich, D. and Solnica-Krezel, L. (2002). Zebrafish Rho kinase 2 acts downstream of Wnt11 to mediate cell polarity and effective convergence and extension movements. *Curr. Biol.* **12**, 876-884.
- Marsden, M. and DeSimone, D. W. (2001). Regulation of cell polarity, radial intercalation and epiboly in Xenopus: novel roles for integrin and fibronectin. *Development* **128**, 3635-3647.
- Matsui, T., Raya, A., Kawakami, Y., Collol-Massot, C., Capdevila, J., Rodriguez-Esteban, C. and Izpisua Belmonte, J. C. (2005). Noncanonical Wnt signaling regulates midline convergence of organ primordia during zebrafish development. *Genes Dev.* **19**, 164-175.
- McGrew, L. L., Lai, C. J. and Moon, R. T. (1995). Specification of the anteroposterior neural axis through synergistic interaction of the Wnt signaling cascade with noggin and follistatin. *Dev. Biol.* **172**, 337-342.
- McGrew, L. L., Hoppler, S. and Moon, R. T. (1997). Wnt and FGF pathways cooperatively pattern anteroposterior neural ectoderm in Xenopus. *Mech. Dev.* **69**, 105-114.
- Miller, J. R., Hocking, A. M., Brown, J. D. and Moon, R. T. (1999a). Mechanism and function of signal transduction by the Wnt/ $\beta$ -catenin and Wnt/Ca<sup>2+</sup> pathways. *Oncogene* **18**, 7860-7872.
- Miller, J. R., Rowning, B. A., Larabell, C. A., Yang-Snyder, J. A., Bates, R. L. and Moon, R. T. (1999b). Establishment of the dorsal-ventral axis in Xenopus embryos coincides with the dorsal enrichment of dishevelled that is dependent on cortical rotation. *J. Cell Biol.* **146**, 427-437.
- Miyakoshi, A., Ueno, N. and Kinoshita, N. (2004). Rho guanine nucleotide exchange factor xNET1 implicated in gastrulation movements during Xenopus development. *Differentiation* **72**, 48-55.
- Mlodzik, M. (2002). Planar cell polarization: do the same mechanisms regulate Drosophila tissue polarity and vertebrate gastrulation? *Trends Genet.* **18**, 564-571.
- Moriguchi, T., Kawachi, K., Kamakura, S., Masuyama, N., Yamanaka, H., Matsumoto, K., Kikuchi, A. and Nishida, E. (1999). Distinct domains of mouse dishevelled are responsible for the c-Jun N-terminal kinase/stress-activated protein kinase activation and the axis formation in vertebrates. *J. Biol. Chem.* **274**, 30957-30962.
- Noordermeer, J., Klingensmith, J., Perrimon, N. and Nusse, R. (1994). dishevelled and armadillo act in the wingless signalling pathway in Drosophila. *Nature* **367**, 80-83.
- Nubler-Jung, K., Bonitz, R. and Sonnenschein, M. (1987). Cell polarity during wound healing in an insect epidermis. *Development* **100**, 163-170.
- Nusslein-Volhard, C. and Wieschaus, E. (1980). Mutations affecting segment number and polarity in Drosophila. *Nature* **287**, 795-801.
- Olson, E. N. and Schneider, M. D. (2003). Sizing up the heart: development redux in disease. *Genes Dev.* **17**, 1937-1956.
- Oshita, A., Kishida, S., Kobayashi, H., Michiue, T., Asahara, T., Asashima, M. and Kikuchi, A. (2003). Identification and characterization of a novel Dvl-binding protein that suppresses Wnt signalling pathway. *Genes Cells* **8**, 1005-1017.
- Ossipova, O., Dhawan, S., Sokol, S. and Green, J. B. (2005). Distinct PAR-1 proteins function in different branches of Wnt signaling during vertebrate development. *Dev. Cell* **8**, 829-841.
- Pan, W. J., Pang, S. Z., Huang, T., Guo, H. Y., Wu, D. and Li, L. (2004). Characterization of function of three domains in dishevelled-1: DEP domain is responsible for membrane translocation of dishevelled-1. *Cell Res.* **14**, 324-330.
- Pandur, P., Lasche, M., Eisenberg, L. M. and Kuhl, M. (2002). Wnt-11 activation of a non-canonical Wnt signalling pathway is required for cardiogenesis. *Nature* **418**, 636-641.
- Park, M. and Moon, R. T. (2002). The planar cell-polarity gene *stbm* regulates cell behaviour and cell fate in vertebrate embryos. *Nat. Cell Biol.* **4**, 20-25.
- Park, T. J., Gray, R. S., Sato, A., Habas, R. and Wallingford, J. B. (2005). Subcellular localization and signaling properties of dishevelled in developing vertebrate embryos. *Curr. Biol.* **15**, 1039-1044.
- Penton, A., Wodarz, A. and Nusse, R. (2002). A mutational analysis of dishevelled in Drosophila defines novel domains in the dishevelled protein as well as novel suppressing alleles of axin. *Genetics* **161**, 747-762.
- Perrimon, N. and Mahowald, A. P. (1987). Multiple functions of segment polarity genes in Drosophila. *Dev. Biol.* **119**, 587-600.
- Peters, J. M., McKay, R. M., McKay, J. P. and Graff, J. M. (1999). Casein kinase I transduces Wnt signals. *Nature* **401**, 345-350.
- Phillips, H. M., Murdoch, J. N., Chaudhry, B., Copp, A. J. and Henderson, D. J. (2005). Vangl2 acts via RhoA signaling to regulate polarized cell movements during development of the proximal outflow tract. *Circ. Res.* **96**, 292-299.
- Pinson, K. I., Brennan, J., Monkley, S., Avery, B. J. and Skarnes, W. C. (2000). An LDL-receptor-related protein mediates Wnt signalling in mice. *Nature* **407**, 535-538.
- Pizzuti, A., Amati, F., Calabrese, G., Mari, A., Colosimo, A., Silani, V., Giardino, L., Ratti, A., Penso, D., Calza, L. et al. (1996). cDNA characterization and chromosomal mapping of two human homologues of the Drosophila dishevelled polarity gene. *Hum. Mol. Genet.* **5**, 953-958.
- Ratcliffe, M. J., Itoh, K. and Sokol, S. Y. (2000). A positive role for the PP2A catalytic subunit in Wnt signal transduction. *J. Biol. Chem.* **275**, 35680-35683.
- Riggleman, B., Schedl, P. and Wieschaus, E. (1990). Spatial expression of the Drosophila segment polarity gene *armadillo* is posttranscriptionally regulated by wingless. *Cell* **63**, 549-560.
- Rosso, S. B., Sussman, D., Wynshaw-Boris, A. and Salinas, P. C. (2005). Wnt signaling through Dishevelled, Rac and JNK regulates dendritic development. *Nat. Neurosci.* **8**, 34-42.
- Rothbacher, U., Laurent, M. N., Blitz, I. L., Watabe, T., Marsh, J. L. and Cho, K. W. (1995). Functional conservation of the Wnt signaling pathway revealed by ectopic expression of Drosophila dishevelled in Xenopus. *Dev. Biol.* **170**, 717-721.
- Rothbacher, U., Laurent, M. N., Deardorff, M. A., Klein, P. S., Cho, K. W. Y. and Fraser, S. E. (2000). Dishevelled phosphorylation, subcellular localization and homomerization regulate its role in early embryogenesis. *EMBO J.* **19**, 1010-1022.

- Rousset, R., Mack, J. A., Wharton, K. A., Jr, Axelrod, J. D., Cadigan, K. M., Fish, M. P., Nusse, R. and Scott, M. P. (2001). Naked cuticle targets dishevelled to antagonize Wnt signal transduction. *Genes Dev.* **15**, 658-671.
- Sagot, I., Rodal, A. A., Moseley, J., Goode, B. L. and Pellman, D. (2002). An actin nucleation mechanism mediated by Bni1 and profilin. *Nat. Cell Biol.* **4**, 626-631.
- Sakanaka, C., Leong, P., Xu, L., Harrison, S. D. and Williams, L. T. (1999). Casein kinase epsilon in the wnt pathway: regulation of  $\beta$ -catenin function. *Proc. Natl. Acad. Sci. USA* **96**, 12548-12552.
- Saraga-Babic, M., Sapunar, D. and Stefanovic, V. (1993). Histological features of axial structures during embryonic and fetal stages of human craniorachischisis. *Acta Neuropathol. (Berl.)* **86**, 289-294.
- Sasai, N., Nakazawa, Y., Haraguchi, T. and Sasai, Y. (2004). The neurotrophin-receptor-related protein NRH1 is essential for convergent extension movements. *Nat. Cell Biol.* **6**, 741-748.
- Schlesinger, A., Shelton, C. A., Maloof, J. N., Meneghini, M. and Bowerman, B. (1999). Wnt pathway components orient a mitotic spindle in the early *Caenorhabditis elegans* embryo without requiring gene transcription in the responding cell. *Genes Dev.* **13**, 2028-2038.
- Schulte, G., Bryja, V., Rawal, N., Castelo-Branco, G., Sousa, K. M. and Arenas, E. (2005). Purified Wnt-5a increases differentiation of midbrain dopaminergic cells and dishevelled phosphorylation. *J. Neurochem.* **92**, 1550-1553.
- Schweizer, L. and Varmus, H. (2003). Wnt/Wingless signaling through  $\beta$ -catenin requires the function of both LRP/Arrow and frizzled classes of receptors. *BMC Cell Biol.* **4**, 4.
- Semenov, M. V. and Snyder, M. (1997). Human dishevelled genes constitute a DHR-containing multigene family. *Genomics* **42**, 302-310.
- Seto, E. S. and Bellen, H. J. (2004). The ins and outs of Wingless signaling. *Trends Cell Biol.* **14**, 45-53.
- Sheldahl, L. C., Park, M., Malbon, C. C. and Moon, R. T. (1999). Protein kinase C is differentially stimulated by Wnt and Frizzled homologs in a G-protein-dependent manner. *Curr. Biol.* **9**, 695-698.
- Sheldahl, L. C., Slusarski, D. C., Pandur, P., Miller, J. R., Kuhl, M. and Moon, R. T. (2003). Dishevelled activates Ca<sup>2+</sup> flux, PKC, and CamKII in vertebrate embryos. *J. Cell Biol.* **161**, 769-777.
- Siegfried, E., Wilder, E. L. and Perrimon, N. (1994). Components of wingless signalling in *Drosophila*. *Nature* **367**, 76-80.
- Simons, M., Gloy, J., Ganner, A., Bullerkotte, A., Bashkurov, M., Kronig, C., Schermer, B., Benzinger, T., Cabello, O. A., Jenny, A. et al. (2005). Inversin, the gene product mutated in nephronophthisis type II, functions as a molecular switch between Wnt signaling pathways. *Nat. Genet.* **37**, 537-543.
- Smalley, M. J., Sara, E., Paterson, H., Naylor, S., Cook, D., Jayatilake, H., Fryer, L. G., Hutchinson, L., Fry, M. J. and Dale, T. C. (1999). Interaction of axin and Dvl-2 proteins regulates Dvl-2-stimulated TCF-dependent transcription. *EMBO J.* **18**, 2823-2835.
- Sokol, S. Y. (1996). Analysis of Dishevelled signalling pathways during *Xenopus* development. *Curr. Biol.* **6**, 1456-1467.
- Sokol, S. Y., Klingensmith, J., Perrimon, N. and Itoh, K. (1995). Dorsalizing and neutralizing properties of Xdsh, a maternally expressed *Xenopus* homolog of dishevelled. *Development* **121**, 1637-1647.
- Solnica-Krezel, L. (2005). Conserved patterns of cell movements during vertebrate gastrulation. *Curr. Biol.* **15**, R213-R228.
- Steitz, S. A., Tsang, M. and Sussman, D. J. (1996). Wnt-mediated relocalization of dishevelled proteins. *In Vitro Cell. Dev. Biol. Anim.* **32**, 441-445.
- Strigini, M. and Cohen, S. M. (2000). Wingless gradient formation in the *Drosophila* wing. *Curr. Biol.* **10**, 293-300.
- Strovel, E. T., Wu, D. and Sussman, D. J. (2000). Protein phosphatase 2C $\alpha$  dephosphorylates axin and activates LEF-1-dependent transcription. *J. Biol. Chem.* **275**, 2399-2403.
- Strutt, D. I., Weber, U. and Mlodzik, M. (1997). The role of RhoA in tissue polarity and Frizzled signalling. *Nature* **387**, 292-295.
- Strutt, D., Johnson, R., Cooper, K. and Bray, S. (2002). Asymmetric localization of frizzled and the determination of notch-dependent cell fate in the *Drosophila* eye. *Curr. Biol.* **12**, 813-824.
- Sulik, K., Dehart, D. B., Iangaki, T., Carson, J. L., Vrablic, T., Gesteland, K. and Schoenwolf, G. C. (1994). Morphogenesis of the murine node and notochordal plate. *Dev. Dyn.* **201**, 260-278.
- Sun, T. Q., Lu, B., Feng, J. J., Reinhard, C., Jan, Y. N., Fantl, W. J. and Williams, L. T. (2001). PAR-1 is a Dishevelled-associated kinase and a positive regulator of Wnt signalling. *Nat. Cell Biol.* **3**, 628-636.
- Sussman, D. J., Klingensmith, J., Salinas, P., Adams, P. S., Nusse, R. and Perrimon, N. (1994). Isolation and characterization of a mouse homolog of the *Drosophila* segment polarity gene dishevelled. *Dev. Biol.* **166**, 73-86.
- Tada, M. and Smith, J. C. (2000). Xwnt11 is a target of *Xenopus* Brachyury: regulation of gastrulation movements via Dishevelled, but not through the canonical Wnt pathway. *Development* **127**, 2227-2238.
- Tahinci, E. and Symes, K. (2003). Distinct functions of Rho and Rac are required for convergent extension during *Xenopus* gastrulation. *Dev. Biol.* **259**, 318-335.
- Tamai, K., Semenov, M., Kato, Y., Spokony, R., Liu, C., Katsuyama, Y., Hess, F., Saint-Jeannet, J. P. and He, X. (2000). LDL-receptor-related proteins in Wnt signal transduction. *Nature* **407**, 530-535.
- Tanaka, M., Kamo, T., Ota, S. and Sugimura, H. (2003). Association of Dishevelled with Eph tyrosine kinase receptor and ephrin mediates cell repulsion. *EMBO J.* **22**, 847-858.
- Tao, Q., Yokota, C., Puck, H., Kofron, M., Birsoy, B., Yan, D., Asashima, M., Wylie, C. C., Lin, X. and Heasman, J. (2005). Maternal wnt11 activates the canonical wnt signaling pathway required for axis formation in *Xenopus* embryos. *Cell* **120**, 857-871.
- Theisen, H., Purcell, J., Bennett, M., Kansagara, D., Syed, A. and Marsh, J. L. (1994). dishevelled is required during wingless signaling to establish both cell polarity and cell identity. *Development* **120**, 347-360.
- Tolwinski, N. S. and Wieschaus, E. (2004). Rethinking WNT signaling. *Trends Genet.* **20**, 177-181.
- Tolwinski, N. S., Wehrli, M., Rives, A., Erdeniz, N., DiNardo, S. and Wieschaus, E. (2003). Wg/Wnt signal can be transmitted through arrow/LRP5,6 and Axin independently of Zw3/Gsk3 $\beta$  activity. *Dev. Cell* **4**, 407-418.
- Topczewski, J., Sepich, D. S., Myers, D. C., Walker, C., Amores, A., Lele, Z., Hammerschmidt, M., Postlethwait, J. and Solnica-Krezel, L. (2001). The zebrafish glypican knypek controls cell polarity during gastrulation movements of convergent extension. *Dev. Cell* **1**, 251-264.
- Torres, M. A. and Nelson, W. J. (2000). Colocalization and redistribution of dishevelled and actin during Wnt-induced mesenchymal morphogenesis. *J. Cell Biol.* **149**, 1433-1442.
- Torres, M. A., Yang-Snyder, J. A., Purcell, S. M., DeMarais, A. A., McGrew, L. L. and Moon, R. T. (1996). Activities of the Wnt-1 class of secreted signaling factors are antagonized by the Wnt-5A class and by a dominant negative cadherin in early *Xenopus* development. *J. Cell Biol.* **133**, 1123-1137.
- Tree, D. R., Shulman, J. M., Rousset, R., Scott, M. P., Gubb, D. and Axelrod, J. D. (2002). Prickle mediates feedback amplification to generate asymmetric planar cell polarity signaling. *Cell* **109**, 371-381.
- Tsang, M., Lijam, N., Yang, Y., Beier, D. R., Wynshaw-Boris, A. and Sussman, D. J. (1996). Isolation and characterization of mouse dishevelled-3. *Dev. Dyn.* **207**, 253-262.
- Tzahor, E. and Lassar, A. B. (2001). Wnt signals from the neural tube block ectopic cardiogenesis. *Genes Dev.* **15**, 255-260.
- Umbhauer, M., Djiane, A., Goisset, C., Penzo-Mendez, A., Riou, J. F., Boucaut, J. C. and Shi, D. L. (2000). The C-terminal cytoplasmic Lys-thr-X-X-X-Trp motif in frizzled receptors mediates Wnt/ $\beta$ -catenin signalling. *EMBO J.* **19**, 4944-4954.
- van Noort, M., Meeldijk, J., van der Zee, R., Destree, O. and Clevers, H. (2002). Wnt signaling controls the phosphorylation status of  $\beta$ -catenin. *J. Biol. Chem.* **277**, 17901-17905.
- Van Straaten, H. W., Janssen, H. C., Peeters, M. C., Copp, A. J. and Hekking, J. W. (1996). Neural tube closure in the chick embryo is multiphasic. *Dev. Dyn.* **207**, 309-318.
- Veeman, M. T., Axelrod, J. D. and Moon, R. T. (2003). A second canon. Functions and mechanisms of  $\beta$ -catenin-independent Wnt signaling. *Dev. Cell* **5**, 367-377.
- Vinson, C. R. and Adler, P. N. (1987). Directional non-cell autonomy and the transmission of polarity information by the frizzled gene of *Drosophila*. *Nature* **329**, 549-551.
- Wakefield, J. G., Stephens, D. J. and Tavaré, J. M. (2003). A role for glycogen synthase kinase-3 in mitotic spindle dynamics and chromosome alignment. *J. Cell Sci.* **116**, 637-646.
- Wallingford, J. B. and Harland, R. M. (2001). *Xenopus* Dishevelled signaling regulates both neural and mesodermal convergent extension: parallel forces elongating the body axis. *Development* **128**, 2581-2592.
- Wallingford, J. B. and Harland, R. M. (2002). Neural tube closure requires Dishevelled-dependent convergent extension of the midline. *Development* **129**, 5815-5825.

- Wallingford, J. B., Rowning, B. A., Vogeli, K. M., Rothbacher, U., Fraser, S. E. and Harland, R. M. (2000). Dishevelled controls cell polarity during *Xenopus* gastrulation. *Nature* **405**, 81-85.
- Wallingford, J. B., Fraser, S. E. and Harland, R. M. (2002). Convergent extension: the molecular control of polarized cell movement during embryonic development. *Dev. Cell* **2**, 695-706.
- Walston, T., Tuskey, C., Edgar, L., Hawkins, N., Ellis, G., Bowerman, B., Wood, W. and Hardin, J. (2004). Multiple Wnt signaling pathways converge to orient the mitotic spindle in early *C. elegans* embryos. *Dev. Cell* **7**, 831-841.
- Watanabe, N. and Higashida, C. (2004). Formins: processive cappers of growing actin filaments. *Exp. Cell Res.* **301**, 16-22.
- Wechezak, A. R. and Coan, D. E. (2005). Dvl2 silencing in postdevelopmental cells results in aberrant cell membrane activity and actin disorganization. *J. Cell Physiol.* **202**, 867-877.
- Wehrli, M., Dougan, S. T., Caldwell, K., O'Keefe, L., Schwartz, S., Vaizel-Ohayon, D., Schejter, E., Tomlinson, A. and DiNardo, S. (2000). arrow encodes an LDL-receptor-related protein essential for Wingless signalling. *Nature* **407**, 527-530.
- Weitzel, H. E., Illies, M. R., Byrum, C. A., Xu, R., Wikramanayake, A. H. and Ettensohn, C. A. (2004). Differential stability of  $\beta$ -catenin along the animal-vegetal axis of the sea urchin embryo mediated by dishevelled. *Development* **131**, 2947-2956.
- Wharton, K. A., Jr (2003). Runnin' with the Dvl: proteins that associate with Dsh/Dvl and their significance to Wnt signal transduction. *Dev. Biol.* **253**, 1-17.
- Wharton, K. A., Jr, Zimmermann, G., Rousset, R. and Scott, M. P. (2001). Vertebrate proteins related to *Drosophila* Naked Cuticle bind Dishevelled and antagonize Wnt signaling. *Dev. Biol.* **234**, 93-106.
- Wiggan, O. and Hamel, P. A. (2002). Pax3 regulates morphogenetic cell behavior in vitro coincident with activation of a PCP/non-canonical Wnt-signaling cascade. *J. Cell Sci.* **115**, 531-541.
- Wigglesworth, V. B. (1940). Local and general factors in the development of "pattern" in *Rhodnius prolixus* (Hemiptera). *J. Exp. Biol.* **17**, 180-200.
- Wigglesworth, V. B. (1959). *The Control of Growth and Form*. Ithaca, NY: Cornell University Press.
- Willert, K., Brink, M., Wodarz, A., Varmus, H. and Nusse, R. (1997). Casein kinase 2 associates with and phosphorylates dishevelled. *EMBO J.* **16**, 3089-3096.
- Winklbauer, R., Medina, A., Swain, R. K. and Steinbeisser, H. (2001). Frizzled-7 signalling controls tissue separation during *Xenopus* gastrulation. *Nature* **413**, 856-860.
- Winter, C. G., Wang, B., Ballew, A., Royou, A., Karess, R., Axelrod, J. D. and Luo, L. (2001). *Drosophila* Rho-associated kinase (Drok) links Frizzled-mediated planar cell polarity signaling to the actin cytoskeleton. *Cell* **105**, 81-91.
- Wolff, T. and Rubin, G. M. (1998). Strabismus, a novel gene that regulates tissue polarity and cell fate decisions in *Drosophila*. *Development* **125**, 1149-1159.
- Wong, H. C., Mao, J., Nguyen, J. T., Srinivas, S., Zhang, W., Liu, B., Li, L., Wu, D. and Zheng, J. (2000). Structural basis of the recognition of the dishevelled DEP domain in the Wnt signaling pathway. *Nat. Struct. Biol.* **7**, 1178-1184.
- Wong, H. C., Bourdelas, A., Krauss, A., Lee, H. J., Shao, Y., Wu, D., Mlodzik, M., Shi, D. L. and Zheng, J. (2003). Direct binding of the PDZ domain of Dishevelled to a conserved internal sequence in the C-terminal region of Frizzled. *Mol. Cell* **12**, 1251-1260.
- Wong, L. L. and Adler, P. N. (1993). Tissue polarity genes of *Drosophila* regulate the subcellular location for prehair initiation in pupal wing cells. *J. Cell Biol.* **123**, 209-221.
- Wu, J., Klein, T. J. and Mlodzik, M. (2004). Subcellular localization of frizzled receptors, mediated by their cytoplasmic tails, regulates signaling pathway specificity. *PLoS Biol.* **2**, E158.
- Yamanaka, H., Moriguchi, T., Masuyama, N., Kusakabe, M., Hanafusa, H., Takada, R., Takada, S. and Nishida, E. (2002). JNK functions in the non-canonical Wnt pathway to regulate convergent extension movements in vertebrates. *EMBO Rep.* **3**, 69-75.
- Yanagawa, S., van Leeuwen, F., Wodarz, A., Klingensmith, J. and Nusse, R. (1995). The dishevelled protein is modified by wingless signaling in *Drosophila*. *Genes Dev.* **9**, 1087-1097.
- Yanagawa, S., Matsuda, Y., Lee, J. S., Matsubayashi, H., Sese, S., Kadowaki, T. and Ishimoto, A. (2002). Casein kinase I phosphorylates the Armadillo protein and induces its degradation in *Drosophila*. *EMBO J.* **21**, 1733-1742.
- Yang, J., Wu, J., Tan, C. and Klein, P. S. (2003). PP2A:B56epsilon is required for Wnt/ $\beta$ -catenin signaling during embryonic development. *Development* **130**, 5569-5578.
- Yang-Snyder, J., Miller, J. R., Brown, J. D., Lai, C. J. and Moon, R. T. (1996). A frizzled homolog functions in a vertebrate Wnt signaling pathway. *Curr. Biol.* **6**, 1302-1306.
- Yost, C., Torres, M., Miller, J. R., Huang, E., Kimelman, D. and Moon, R. T. (1996). The axis-inducing activity, stability, and subcellular distribution of  $\beta$ -catenin is regulated in *Xenopus* embryos by glycogen synthase kinase 3. *Genes Dev.* **10**, 1443-1454.
- Yost, C., Farr, G. H., 3rd, Pierce, S. B., Ferkey, D. M., Chen, M. M. and Kimelman, D. (1998). GBP, an inhibitor of GSK-3, is implicated in *Xenopus* development and oncogenesis. *Cell* **93**, 1031-1041.
- Zeng, L., Fagotto, F., Zhang, T., Hsu, W., Vasicek, T. J., Perry, W. L., 3rd, Lee, J. J., Tilghman, S. M., Gumbiner, B. M. and Costantini, F. (1997). The mouse Fused encodes Axin, an inhibitor of the Wnt signaling pathway that regulates embryonic axis formation. *Cell* **90**, 181-192.
- Zheng, L., Zhang, J. and Carthew, R. W. (1995). frizzled regulates mirror-symmetric pattern formation in the *Drosophila* eye. *Development* **121**, 3045-3055.
